# Supplementary material for: Visible-light-mediated guest trapping in a photosensitizing porous coordination network: metal-free C–C bond-forming modification of metal–organic frameworks for aqueous-phase herbicide adsorption
Source: Royal Society of Chemistry journal article supplement (doi:10.1039/c9cc01371g), 2019-01-01

## Supporting Information

### **Visible-light-mediated guest trapping in a photosensitizing porous coordination network: metal-free C-C bond-forming modification of metal-organic frameworks for aqueous-phase herbicide adsorption**

*Yong Yang,<sup>b+</sup> Jinxin Che,<sup>a+</sup> Biao Wang,<sup>b</sup> Yizhe Wu,<sup>a</sup> Binhui Chen,<sup>a</sup> Liang Gao,<sup>c</sup> Xiaowu Dong<sup>\*a</sup> and Jinhao Zhao<sup>\*b</sup>*

<sup>a</sup> ZJU-ENS Joint Laboratory of Medicinal Chemistry, Hangzhou Institute of Innovative Medicine, College of Pharmaceutical Sciences, Zhejiang University, Hangzhou, 310058, P. R. China.

<sup>b</sup> Institute of Pesticide and Environmental Toxicology, Ministry of Agriculture Key Lab of Molecular Biology of Crop Pathogens and Inserts, Zhejiang University, Hangzhou 310058, People's Republic of China.

<sup>c</sup> School of Chemical Engineering and Light Industry, Guangdong University of Technology, Guangzhou, 510006, P. R. China.

<sup>+</sup> Y. Yang and J. X. Che contributed equally to this work.

\* Corresponding Author

\* E-mail: dongxw@zju.edu.cn

\* E-mail: jinhaozhao@zju.edu.cn

## Table of Contents

|                             |     |
|-----------------------------|-----|
| Experimental Section        | S3  |
| Fig. S1                     | S9  |
| Fig. S2                     | S10 |
| Fig. S3                     | S11 |
| Fig. S4                     | S12 |
| Fig. S5                     | S13 |
| Fig. S6                     | S14 |
| Fig. S7                     | S17 |
| Fig. S8                     | S18 |
| Fig. S9                     | S19 |
| Fig. S10                    | S20 |
| Fig. S11                    | S21 |
| Fig. S12                    | S22 |
| Table S1                    | S23 |
| References                  | S23 |
| HR-MS                       | S24 |
| $^1\text{H}$ NMR Spectra    | S26 |
| $^{13}\text{C}$ NMR Spectra | S29 |

## Experimental Section

### Chemicals

Chromium nitrate nonahydrate [ $\text{Cr}(\text{NO}_3)_3 \cdot 9\text{H}_2\text{O}$ , 99.95%], terephthalic acid, tin(II) chloride dihydrate ( $\text{SnCl}_2 \cdot 2\text{H}_2\text{O}$ ), hydrofluoric acid (HF), fluoroboric acid ( $\text{HBF}_4$ , 48%), N-bromo succinimide (NBS) and sodium nitrite ( $\text{NaNO}_2$ ) were purchased from Sigma-Aldrich Chemical Co., Ltd. Concentrated nitric acid (conc.  $\text{HNO}_3$ ), concentrated sulfuric acid (conc.  $\text{H}_2\text{SO}_4$ ), N,N-dimethyl formamide (DMF), trifluoroacetic acid (TFA), methanol ( $\text{CH}_3\text{OH}$ ) and ethanol ( $\text{CH}_3\text{CH}_2\text{OH}$ ) were obtained from Sinopharm Chemical Reagent Co., Ltd. All other chemicals in this study were of analytical grade and utilized without further purification.

### Characterization

Powder X-ray diffraction (PXRD) data were obtained at ambient temperature on a Brüker AXS D8 Advance X-ray diffractometer at 40 kV, 40 mA for Cu  $K\alpha$  ( $\lambda = 1.5418 \text{ \AA}$ ), with a scan speed of 1 s per step and a  $2\theta$  range of 5-50 °. Analyses of the morphology of the samples were conducted by using a Hitachi SU8010 scanning electron microscope (SEM). Transmission electron microscope (TEM) images of the materials were taken on a Hitachi H7650 instrument. Brunauer–Emmett–Teller (BET) surface areas were measured by using a Micromeritics ASAP 2020 analyzer at 77 K. The samples were outgassed at 100 °C for 24 h under vacuum prior to measurement. All infrared experiments were performed on a Brüker Alpha FT-IR spectrometer using 1 mg of the solid sample at 4  $\text{cm}^{-1}$  resolution. Before measurement, the samples were dried under vacuum at 100 °C for 24 h. Thermogravimetric analysis (TGA) data were obtained using a PerkinElmer TGA 7 system running from 27 °C to 600 °C with a scan rate of 10 °C·min<sup>-1</sup>. Mass spectra were recorded on an Esquire-LC-00075 mass spectrometer. High performance liquid chromatography (HPLC) analysis [Column: InertSustain<sup>R</sup> C18;

Column temperature: 40 °C; Mobile phase: TFA (1%) -MeOH; Gradient: MeOH reached 20% after the injection and then reached 80% at 15 min; Flow rate: 1 mL·min<sup>-1</sup>; Detection wavelength: 254 nm] was performed on a Shimadzu LC-20A instrument. <sup>1</sup>H NMR spectra were recorded on a Bruker DPX-500 spectrometer at 500 MHz with tetramethyl silane (TMS) as internal standard.

The samples were digested in 10 wt.% sodium hydroxide (NaOH) aqueous solution at 70 °C for MS and HPLC measurements. To obtain <sup>1</sup>H NMR spectra, the materials were first fully digested by NaOH (10 wt.%) at 70 °C for 15 min. The insoluble solid was removed by filtration, and the pH of filtrate was adjusted to 3 by using HCl (6 N). Then, the filtrate was extracted with ethyl acetate. The organic phases were combined and dried in vacuo to afford the corresponding organic ligands.

### Synthesis of dimethyl 2-(furan-2-yl) terephthalate (organic linker) as a model reaction

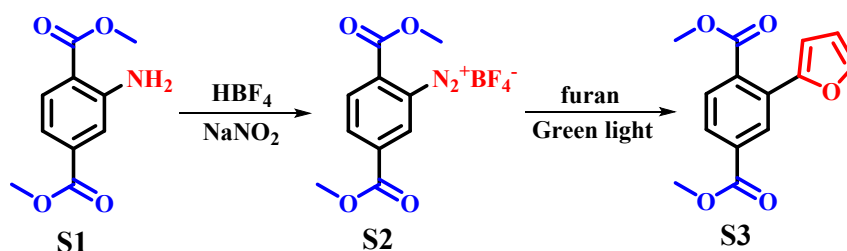

A solution of sodium nitrite (431 mg, 6.25 mmol) in water (2.5 mL) was added dropwise over a period of 10 min to an ice-cooled solution of dimethyl 2-aminoterephthalate (**S1**, 1045 mg, 2.5 mmol) in 20% HBF<sub>4</sub> aqueous solution (7.5 mL). After stirring for a further 1 h at 0 °C, the white precipitation (**S2**) was filtered, washed by methanol and diethyl ether, and then dried under vacuum.

**S2** (77 mg, 0.25mmol) was soaked in water (2.5 mL) and reacted with furan (10 eq.). After the reaction was irradiated under 7 W green LED at room temperature for 6 h, the aqueous phase was extracted with ethyl acetate (5 mL×3). The combined organic phases were dried over anhydrous Na<sub>2</sub>SO<sub>4</sub> and then concentrated under reduced pressure to afford the product **S3** (NMR yield, 48%). The <sup>1</sup>H NMR analysis was performed by using dibromomethane (CH<sub>2</sub>Br<sub>2</sub>) as the internal standard (100 mg).

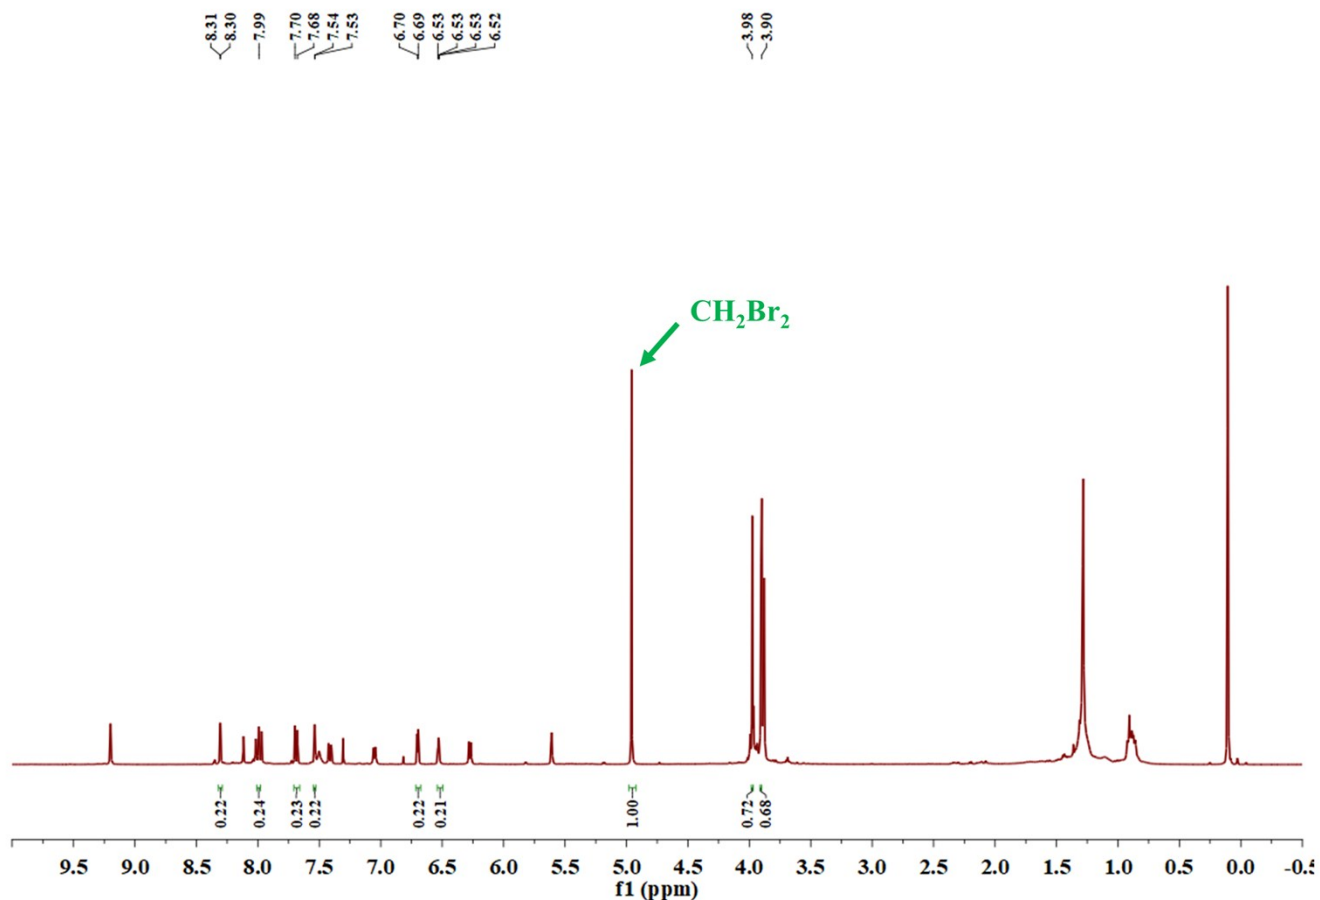

### Preparation of Cr-MIL-101-N<sub>2</sub><sup>+</sup>BF<sub>4</sub><sup>-</sup>

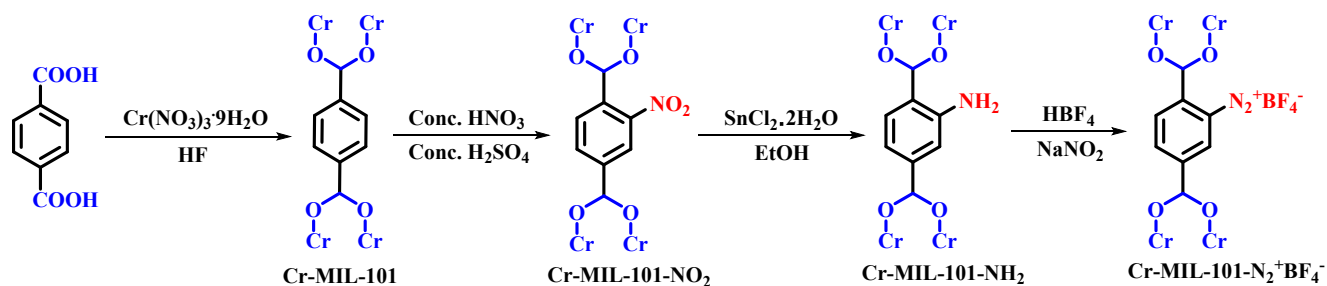

Cr-MIL-101 was initially synthesized starting from Cr(NO<sub>3</sub>)<sub>3</sub>·9H<sub>2</sub>O and terephthalic acid via hydrothermal reaction according to the literature.<sup>S1</sup> Cr-MIL-101-NO<sub>2</sub> was obtained by nitration of Cr-MIL-101 using a mixture solution of conc. HNO<sub>3</sub> and conc. H<sub>2</sub>SO<sub>4</sub>.<sup>S2</sup> Subsequently, the nitro groups were reduced to amino groups using tin(II) chloride dihydrate.<sup>S2</sup> Afterwards, Cr-MIL-101-NH<sub>2</sub> (100

mg) was suspended in 1:1 mixture of water and 48% HBF<sub>4</sub> (2 mL) and diazotized by addition of an aqueous solution of NaNO<sub>2</sub> (50 mg) in water (0.5 mL) and further stirred for 2 h at 0-5 °C.<sup>S3</sup> The solid sample obtained was separated by centrifugation and denoted as Cr-MIL-101-N<sub>2</sub><sup>+</sup>BF<sub>4</sub><sup>-</sup>.

### **General Procedures for Synthesis of Cr-MIL-101-C1~C4**

Cr-MIL-101-N<sub>2</sub><sup>+</sup>BF<sub>4</sub><sup>-</sup> (100 mg, 0.25mmol, according to the ligand) was soaked in water (2.5 mL) and reacted with an appropriate five-membered heterocyclic compound (10 eq.). After the sample was irradiated under 7 W green LED at room temperature for 6 h, the resulting solid was isolated by filtration. The suspension of the obtained solid in ethanol (50 mL) was heated at 60 °C for 1 h, and then filtered to collect the solid (repeating three times). Finally, the resulting solid material was dried under vacuum at 70 °C for 8 h to give title postmodified MOFs.

### **General Procedure for Synthesis of Cr-MIL-101-C5**

In a typical experiment, Cr-MIL-101-C1 (100 mg, 0.25 mmol, according to the ligand) and NBS (1.1 eq.) were added to DMF (1 mL). After the resulting suspension was stirred for 12 h at room temperature, the solid product was isolated by filtration and washed three times with ethanol. The resulting solid material was dried under vacuum at 70 °C for 8 h and denoted as Cr-MIL-101-C5.

### **Competition experiment**

In order to investigate that whether the  $\pi$ - $\pi$  interaction participated, a competition experiment was performed. Atrazine is a herbicide, which has been affirmed that  $\pi$ - $\pi$  stacking is responsible for driving atrazine adsorption (*ACS Appl. Mater. Interfaces*, 2019,11(6): 6097-6103). In a typical adsorption experiment, 3 mg Cr-MIL-101-C1 was added to 40 mL of a fixed pH (7.0) solution of diuron (30 ppm) and atrazine (30 ppm). The removal percentage of diuron decreased by 62%, which indicated that furan-based linkers may offer sites for  $\pi$ - $\pi$  interactions.

**Cr-MIL-101-C1:**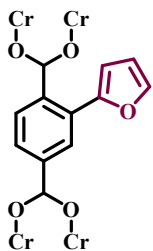

IR (KBr pellet):  $\nu$  3385, 1696, 1566, 1501, 1410, 1305, 1271, 1132, 1045, 1018, 931, 829, 802, 771, 748, 588  $\text{cm}^{-1}$ .  $^1\text{H}$  NMR (500 MHz,  $\text{CD}_3\text{OD}-d_4$ )  $\delta$  8.23 (s, 1H), 7.92 (d,  $J = 8.0$  Hz, 1H), 7.61 (d,  $J = 8.0$  Hz, 1H), 7.54 (s, 1H), 6.70 (d,  $J = 3.3$  Hz, 1H), 6.57 – 6.36 (m, 1H).  $^{13}\text{C}$  NMR (101 MHz,  $\text{CD}_3\text{OD}-d_4$ )  $\delta$  170.93, 167.13, 151.21, 143.05, 133.27, 129.30, 128.45, 128.39, 128.18, 128.03, 111.39, 108.38. ESI-MS:  $m/z$   $[\text{M}-\text{H}]^-$  231. HRMS:  $\text{C}_{12}\text{H}_8\text{O}_5\text{Na}$  for  $[\text{M}+\text{Na}]^+$ , calculated 255.0269, found 255.0265.

**Cr-MIL-101-C2:**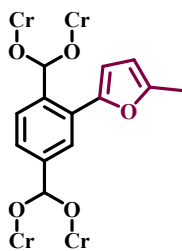

IR (KBr pellet):  $\nu$  3404, 2958, 2924, 2856, 1622, 1568, 1495, 1411, 1304, 1276, 1166, 1090, 832, 771, 748, 667, 586  $\text{cm}^{-1}$ .  $^1\text{H}$  NMR (500 MHz,  $\text{CD}_3\text{OD}-d_4$ )  $\delta$  8.22 (d,  $J = 1.2$  Hz, 1H), 7.89 (dd,  $J = 8.0, 1.3$  Hz, 1H), 7.57 (d,  $J = 8.0$  Hz, 1H), 6.61 (d,  $J = 3.2$  Hz, 1H), 6.08 (d,  $J = 2.5$  Hz, 1H), 2.30 (s, 3H).  $^{13}\text{C}$  NMR (101 MHz,  $\text{CD}_3\text{OD}-d_4$ )  $\delta$  171.30, 167.41, 153.03, 149.33, 134.44, 132.28, 128.97, 128.17, 127.49, 127.38, 109.45, 107.56, 12.04. ESI-MS:  $m/z$   $[\text{M}-\text{H}]^-$  245. HRMS:  $\text{C}_{13}\text{H}_{10}\text{O}_5\text{Na}$  for  $[\text{M}+\text{Na}]^+$ , calculated 269.0426, found 269.0427.

**Cr-MIL-101-C3:**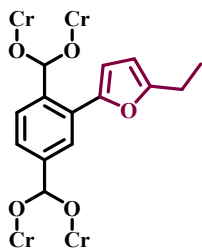

IR (KBr pellet):  $\nu$  3384, 2974, 1699, 1616, 1564, 1500, 1410, 1307, 1270, 1136, 1046, 829, 802, 771, 749, 726, 587  $\text{cm}^{-1}$ .  $^1\text{H}$  NMR (500 MHz,  $\text{CD}_3\text{OD}-d_4$ )  $\delta$  8.21 (d,  $J = 0.8$  Hz, 1H), 7.89 (dd,  $J = 8.0, 1.2$  Hz, 1H), 7.56 (d,  $J = 8.0$  Hz, 1H), 6.62 (d,  $J = 3.2$  Hz, 1H), 6.09 (d,  $J = 3.1$  Hz, 1H), 2.66 (q,  $J = 7.5$  Hz, 2H), 1.23 (t,  $J = 7.5$  Hz, 3H).  $^{13}\text{C}$  NMR (101 MHz,  $\text{CD}_3\text{OD}-d_4$ )  $\delta$  171.43, 167.31, 158.62, 149.31, 134.46, 132.28, 128.99, 128.16, 127.46, 127.41, 109.10, 106.08, 20.91, 11.37. ESI-MS:  $m/z$   $[\text{M}-\text{H}]^-$  259. HRMS:  $\text{C}_{14}\text{H}_{12}\text{O}_5\text{Na}$  for  $[\text{M}+\text{Na}]^+$ , calculated 283.0582, found 283.0581.

**Cr-MIL-101-C4:**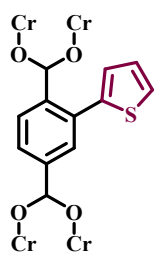

IR (KBr pellet):  $\nu$  3385, 2958, 2924, 1620, 1568, 1504, 1405, 1265, 1136, 838, 770, 749,

582  $\text{cm}^{-1}$ .  $^1\text{H}$  NMR (500 MHz,  $\text{DMSO-}d_6$ )  $\delta$  7.99 (d,  $J = 1.4$  Hz, 1H), 7.97 (dd,  $J = 7.9$ ,

1.6 Hz, 1H), 7.73 (d,  $J = 8.0$  Hz, 1H), 7.65 (dd,  $J = 5.1, 0.9$  Hz, 1H), 7.21 (dd,  $J = 3.6, 1.2$

Hz, 1H), 7.14 (dd,  $J = 5.1, 3.6$  Hz, 1H).  $^{13}\text{C}$  NMR (101 MHz,  $\text{DMSO-}d_6$ )  $\delta$  176.22,

174.61, 139.63, 137.47, 135.96, 134.05, 133.67, 133.12, 132.52, 132.09, 124.58, 122.83. ESI-MS:  $m/z$

$[\text{M-H}]^-$  247. HRMS:  $\text{C}_{12}\text{H}_8\text{O}_4\text{SNa}$  for  $[\text{M}+\text{Na}]^+$ , calculated 271.0041, found 271.0036.

**Cr-MIL-101-C5:**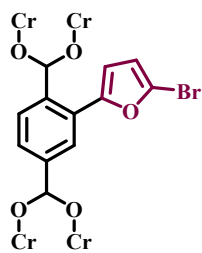

IR (KBr pellet):  $\nu$  3381, 2958, 2925, 2852, 1624, 1566, 1498, 1481, 1412, 1304, 1274,

1167, 1131, 1019, 945, 926, 830, 802, 771, 748, 667, 589  $\text{cm}^{-1}$ .  $^1\text{H}$  NMR (500 MHz,

$\text{DMSO-}d_6$ )  $\delta$  8.12 (d,  $J = 1.5$  Hz, 1H), 7.96 (dd,  $J = 8.0, 1.7$  Hz, 1H), 7.72 (d,  $J = 8.0$

Hz, 1H), 6.91 (d,  $J = 3.5$  Hz, 1H), 6.73 (d,  $J = 3.5$  Hz, 1H).  $^{13}\text{C}$  NMR (101 MHz,

$\text{DMSO-}d_6$ )  $\delta$  174.38, 171.43, 158.25, 139.87, 137.84, 134.67, 134.25, 134.07, 133.12, 127.59, 119.19,

116.74. ESI-MS:  $m/z$   $[\text{M-H}]^-$  309. HRMS:  $\text{C}_{12}\text{H}_7\text{O}_5\text{BrNa}$  for  $[\text{M}+\text{Na}]^+$ , calculated 332.9375, found

332.9372.



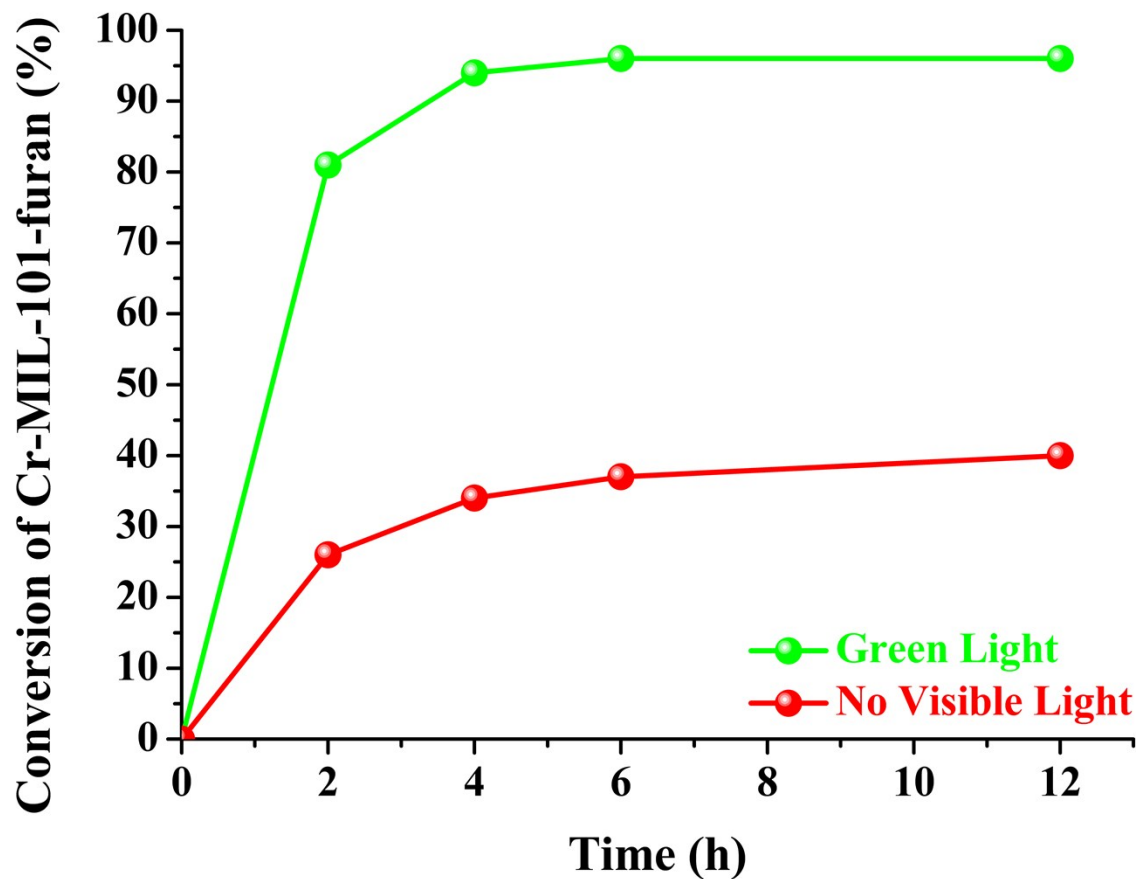

**Fig. S1** Effect of contact time on conversion of Cr-MIL-101-furan (**Cr-MIL-101-C1**). Reactions were performed with Cr-MIL-101-N<sub>2</sub><sup>+</sup>BF<sub>4</sub><sup>-</sup> (0.25 mmol) and furan (10 eq.) in water (2.5 mL) at room temperature. (a) The reaction was irradiated using green LED (7W). (b) The reaction was irradiated without visible light.

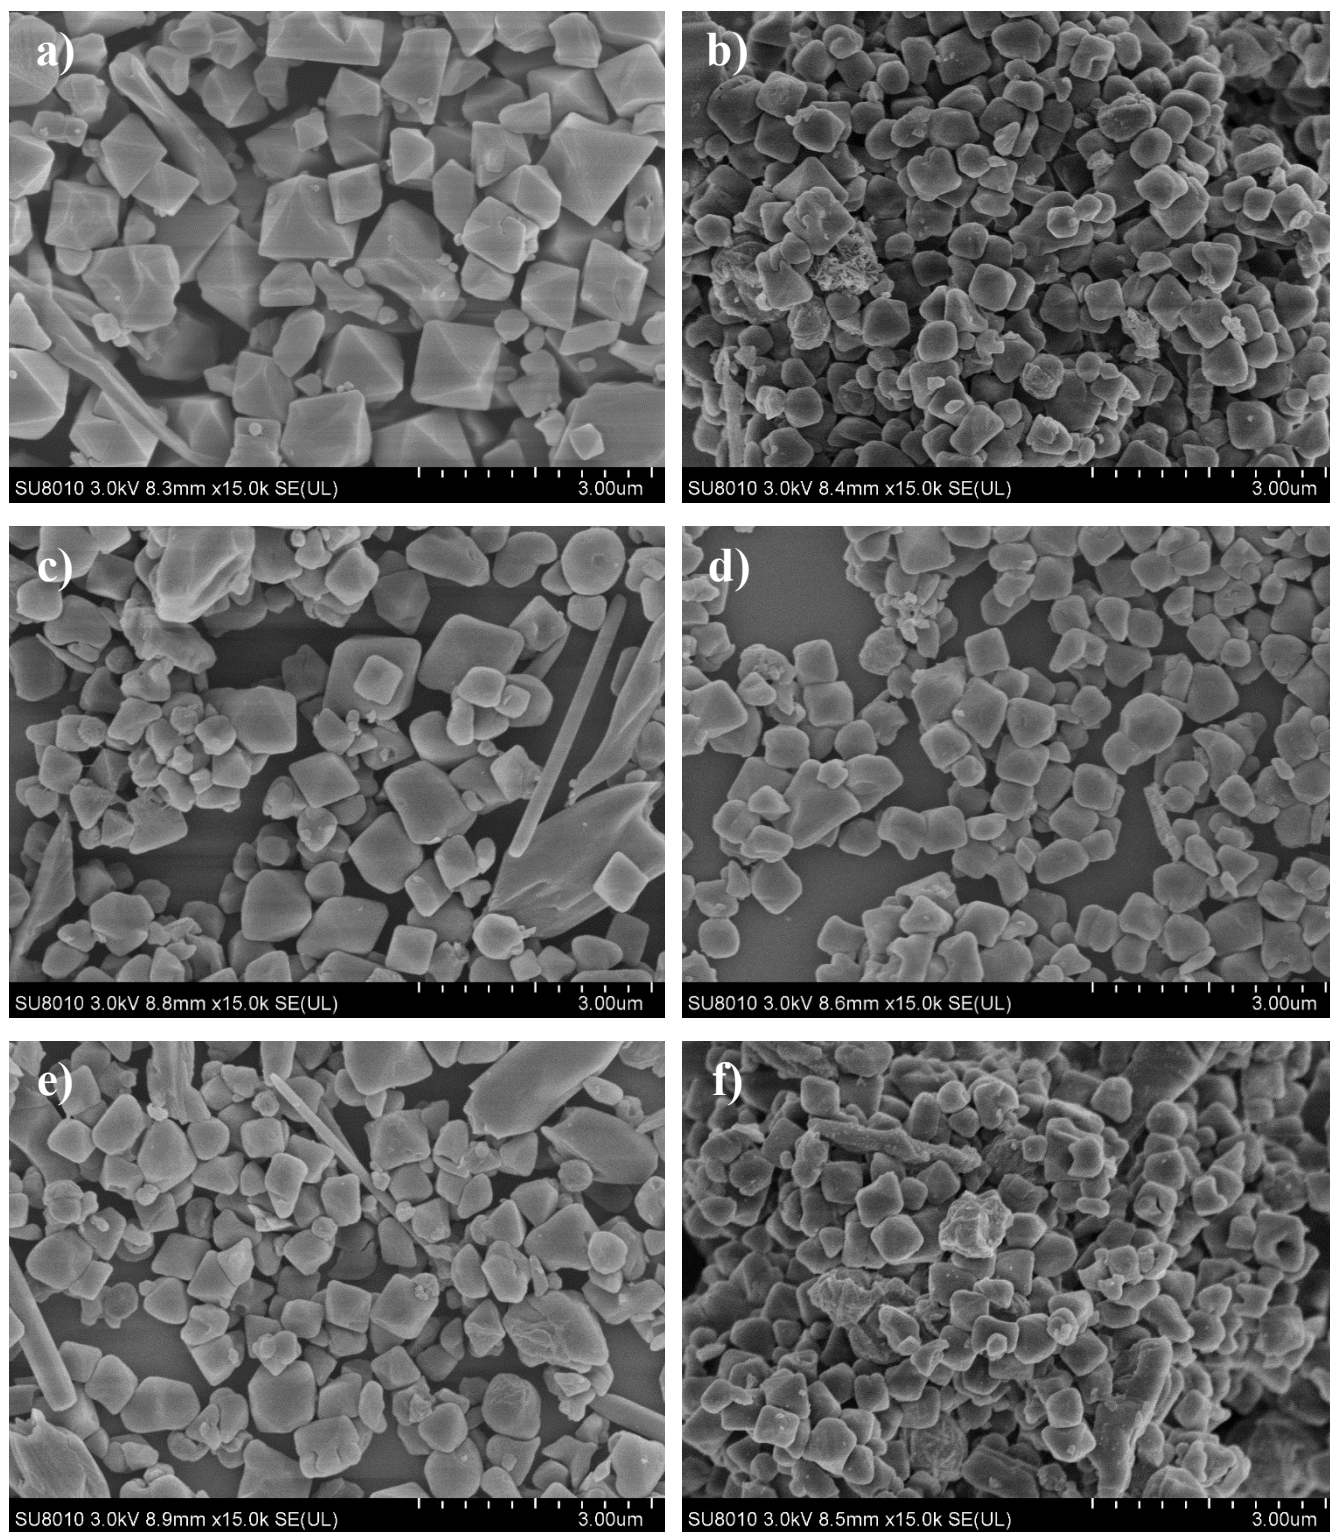

**Fig. S2** SEM images of (a) Cr-MIL-101, (b) Cr-MIL-101-C1, (c) Cr-MIL-101-C2, (d) Cr-MIL-101-C3, (e) Cr-MIL-101-C4 and (f) Cr-MIL-101-C5.

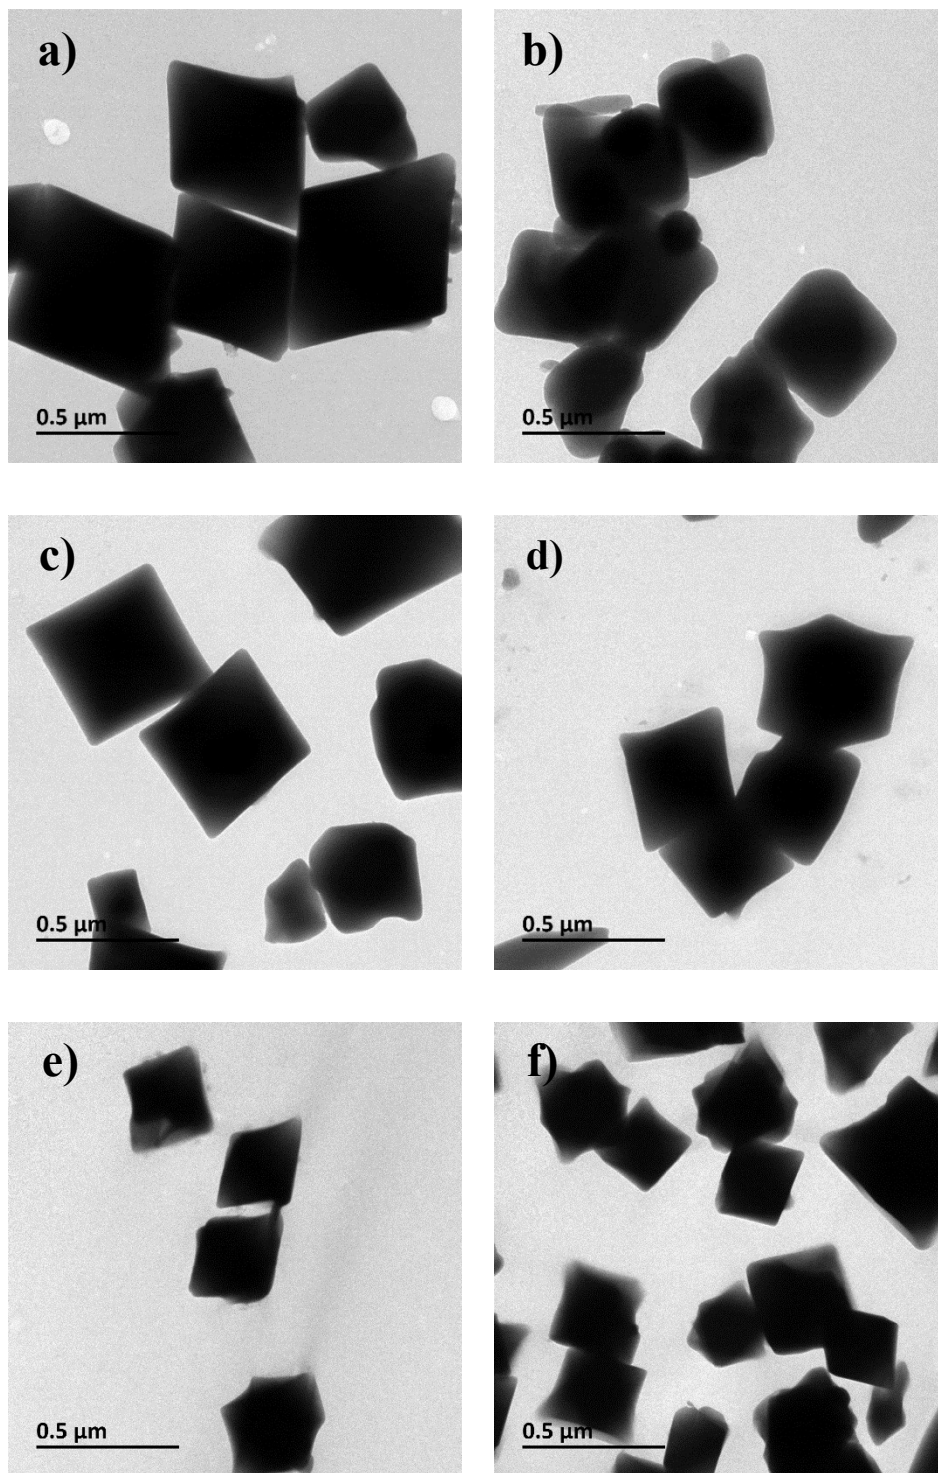

**Fig. S3** TEM images of (a) Cr-MIL-101, (b) Cr-MIL-101-C1, (c) Cr-MIL-101-C2, (d) Cr-MIL-101-C3, (e) Cr-MIL-101-C4 and (f) Cr-MIL-101-C5.

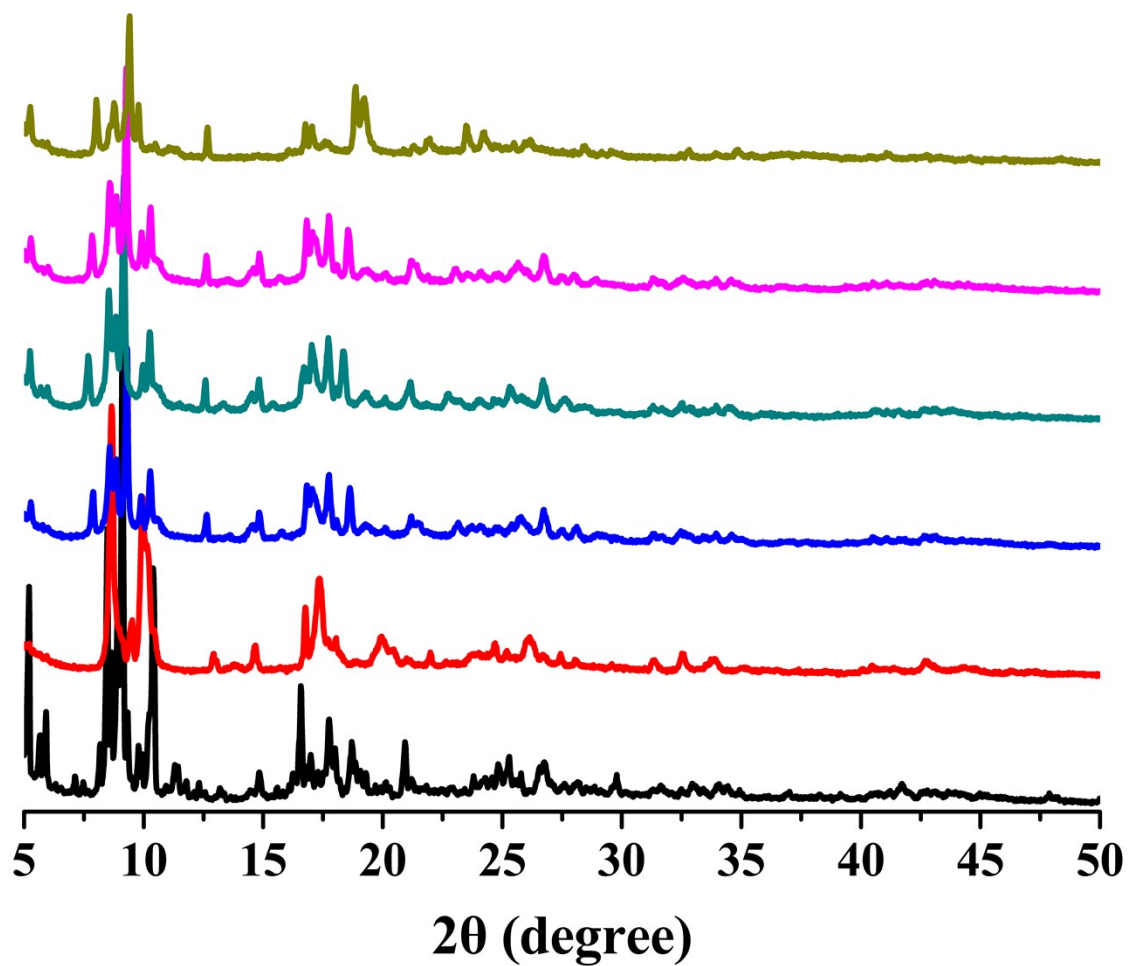

**Fig. S4** PXRD patterns of Cr-MIL-101 (black), Cr-MIL-101-C1 (red), Cr-MIL-101-C2 (blue), Cr-MIL-101-C3 (dark cyan), Cr-MIL-101-C4 (magenta) and Cr-MIL-101-C5 (dark yellow).

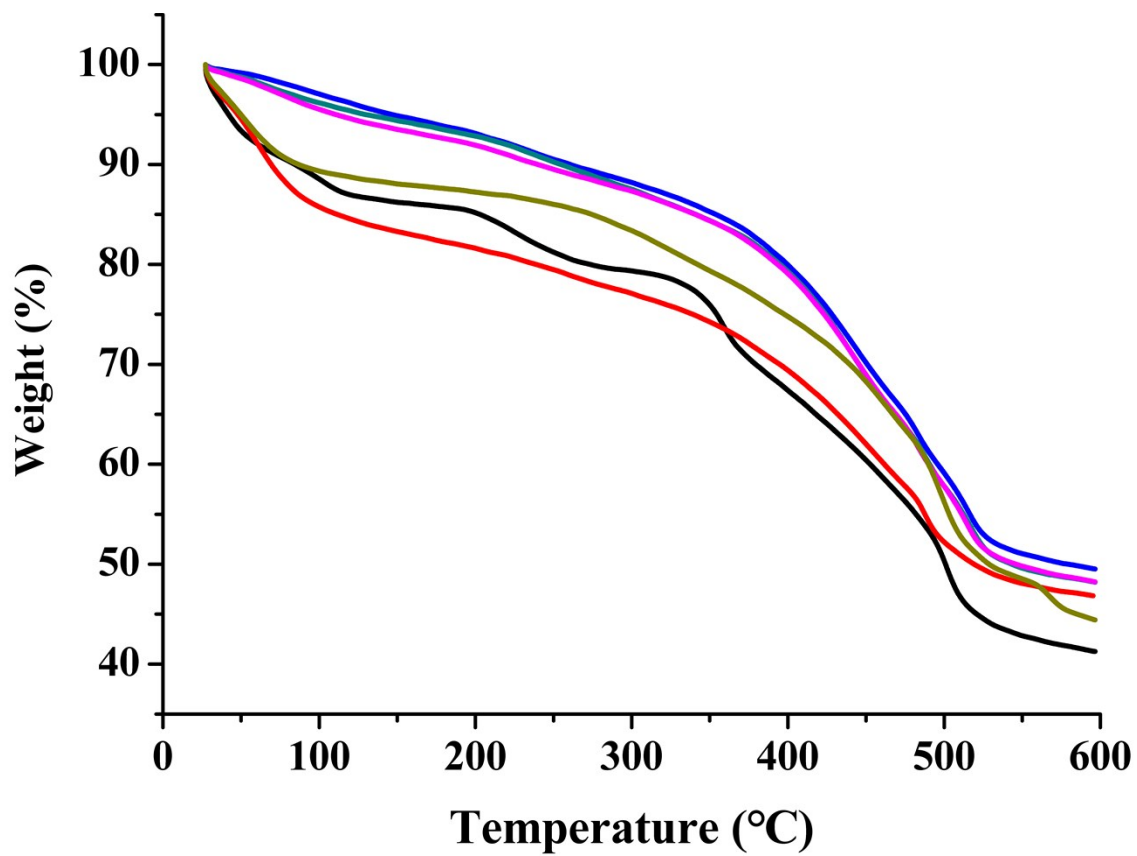

**Fig. S5** TGA plots of Cr-MIL-101 (black), Cr-MIL-101-C1 (red), Cr-MIL-101-C2 (blue), Cr-MIL-101-C3 (dark cyan), Cr-MIL-101-C4 (magenta) and Cr-MIL-101-C5 (dark yellow).

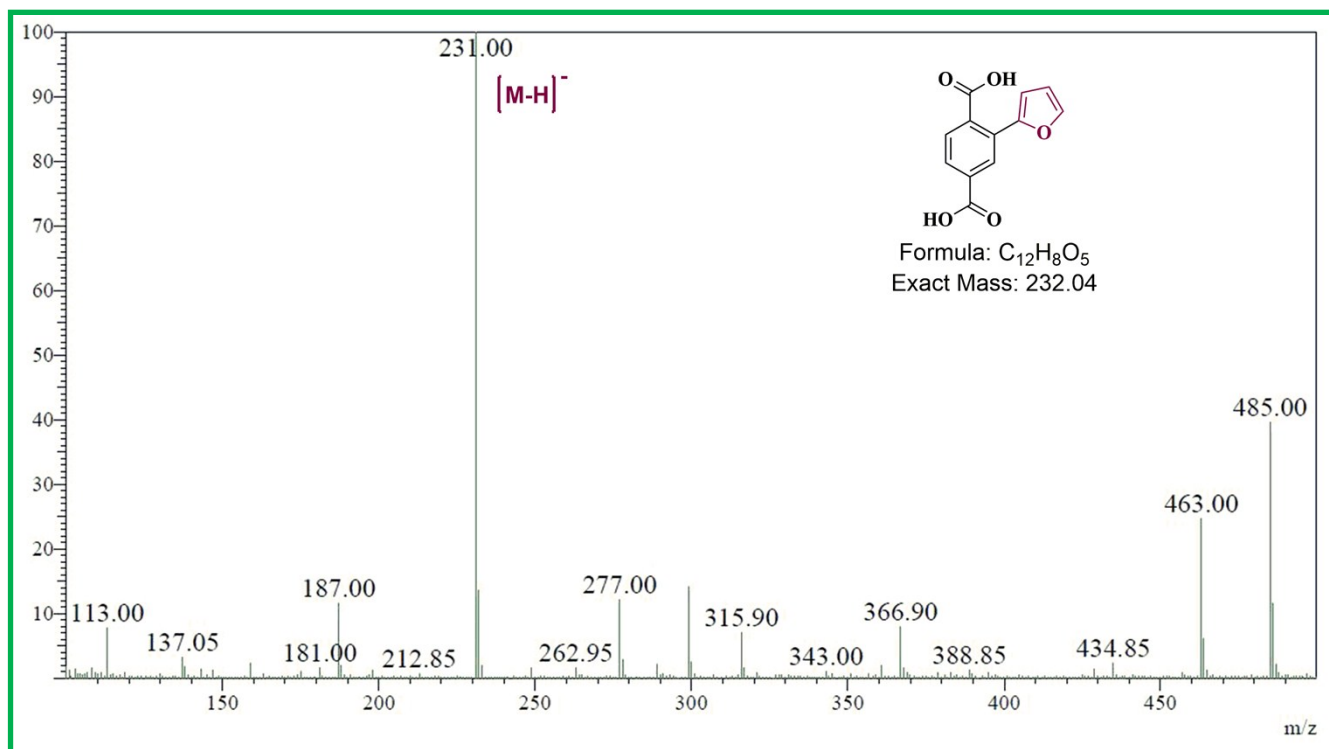

**Fig. S6a** ESI-MS (negative mode) of Cr-MIL-101-C1.

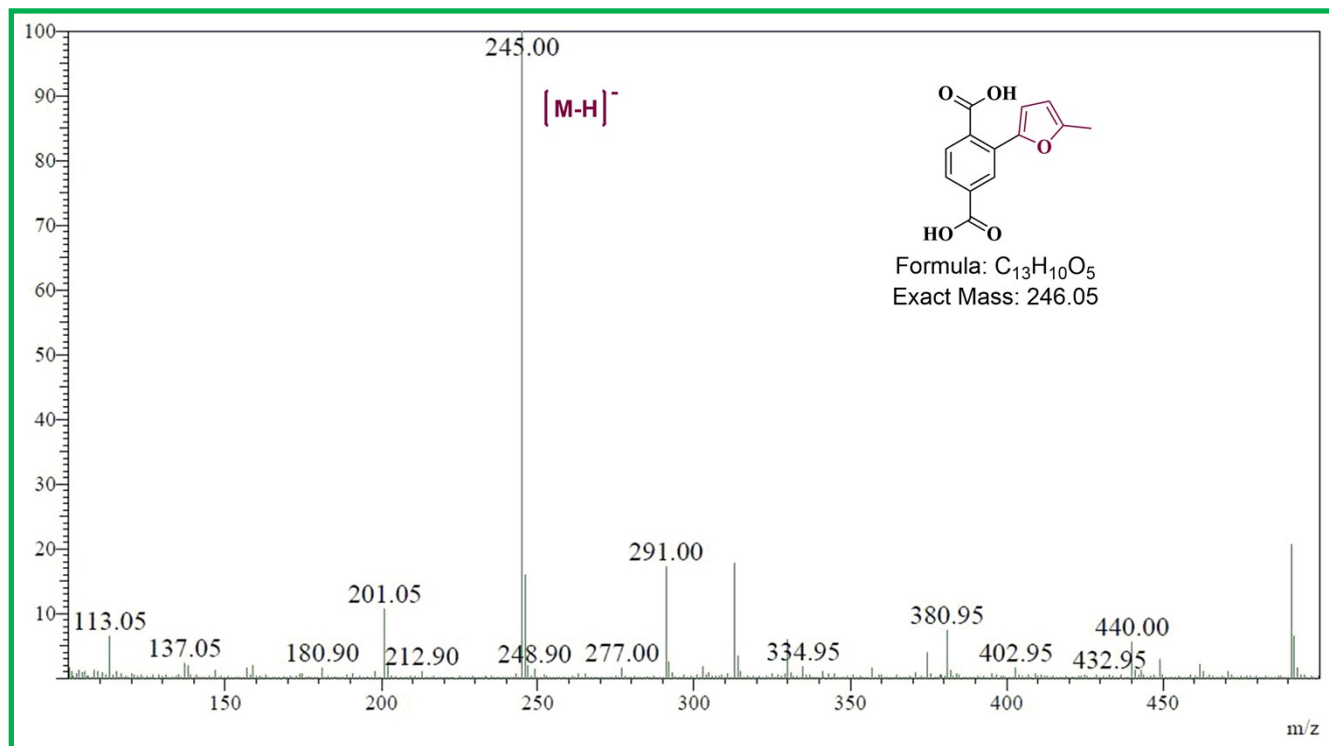

**Fig. S6b** ESI-MS (negative mode) of Cr-MIL-101-C2.

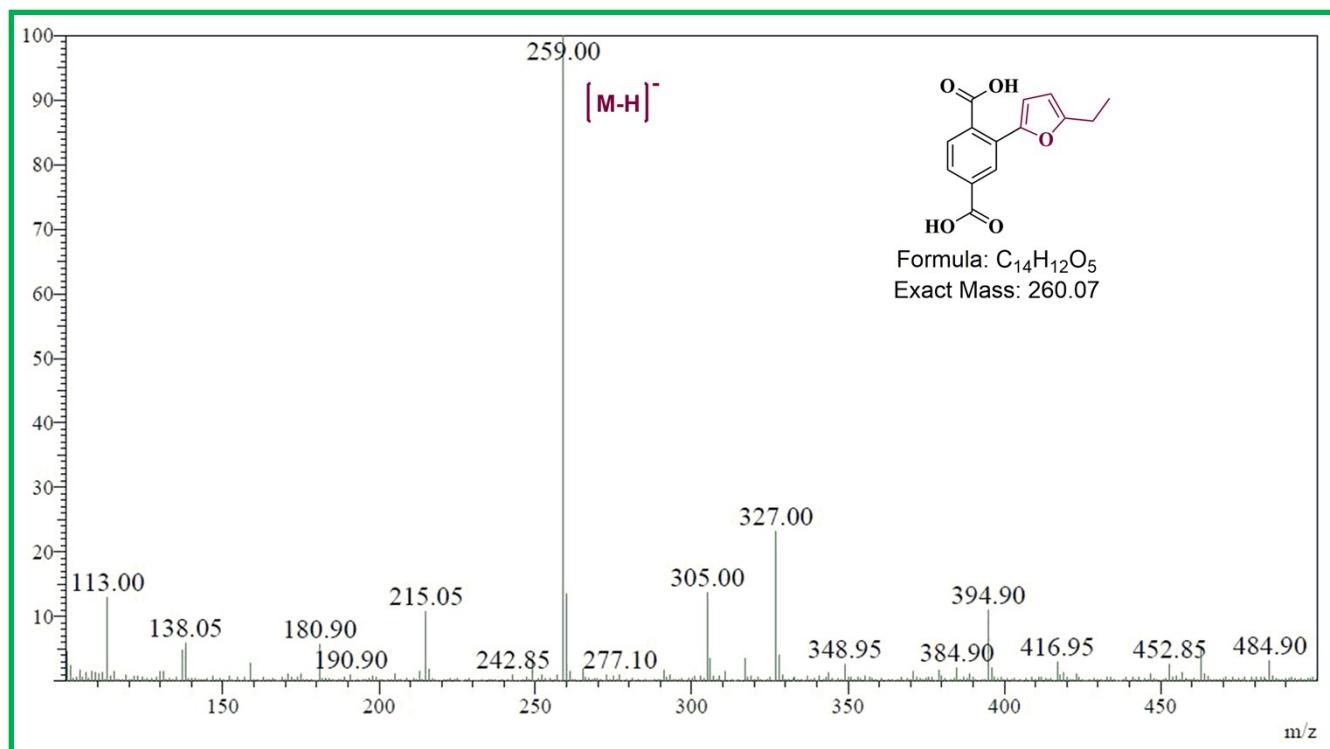

**Fig. S6c** ESI-MS (negative mode) of Cr-MIL-101-C3.

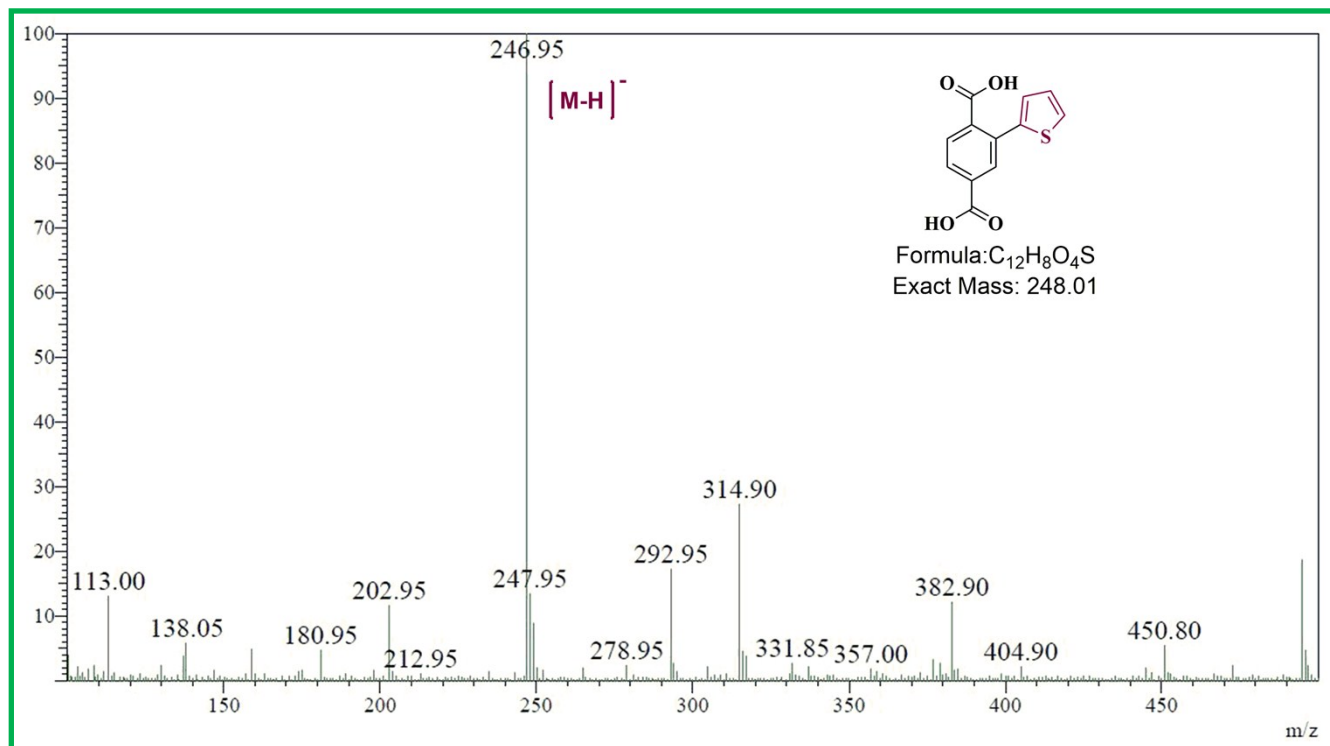

**Fig. S6d** ESI-MS (negative mode) of Cr-MIL-101-C4.

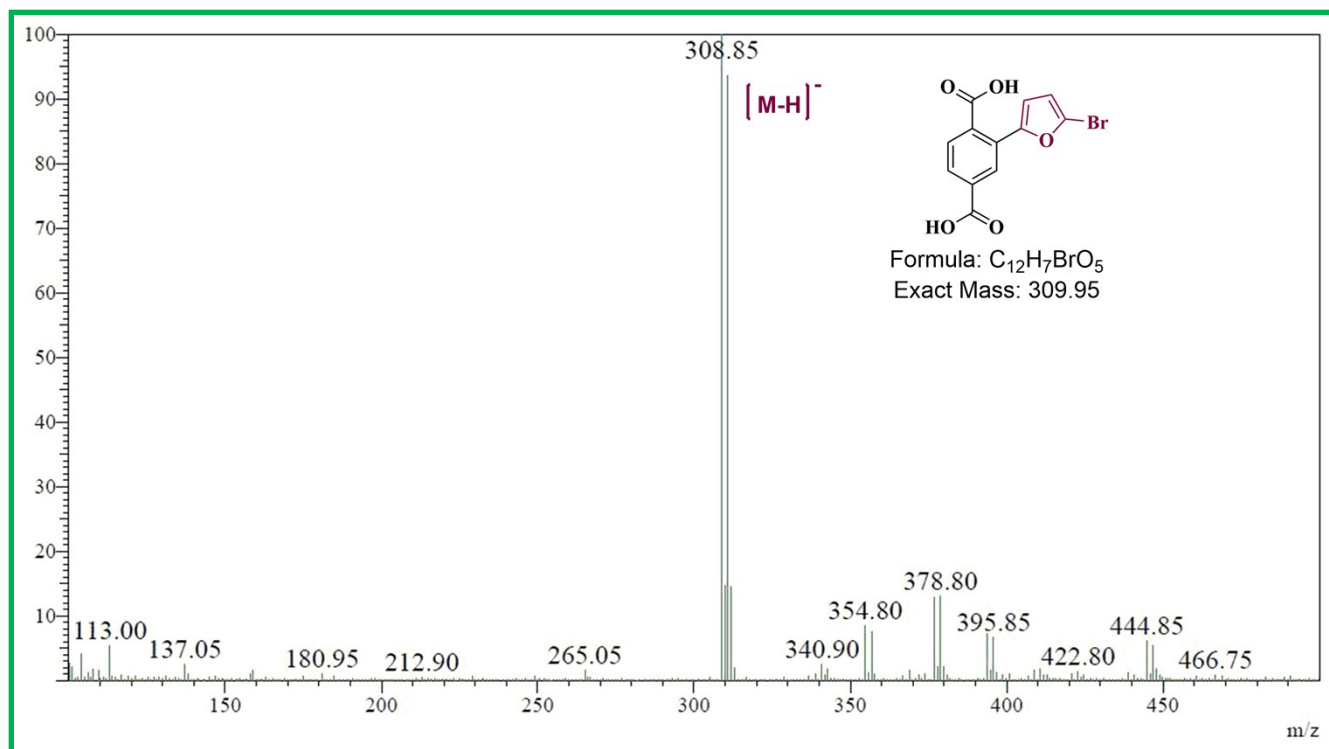

**Fig. S6e** ESI-MS (negative mode) of Cr-MIL-101-C5.



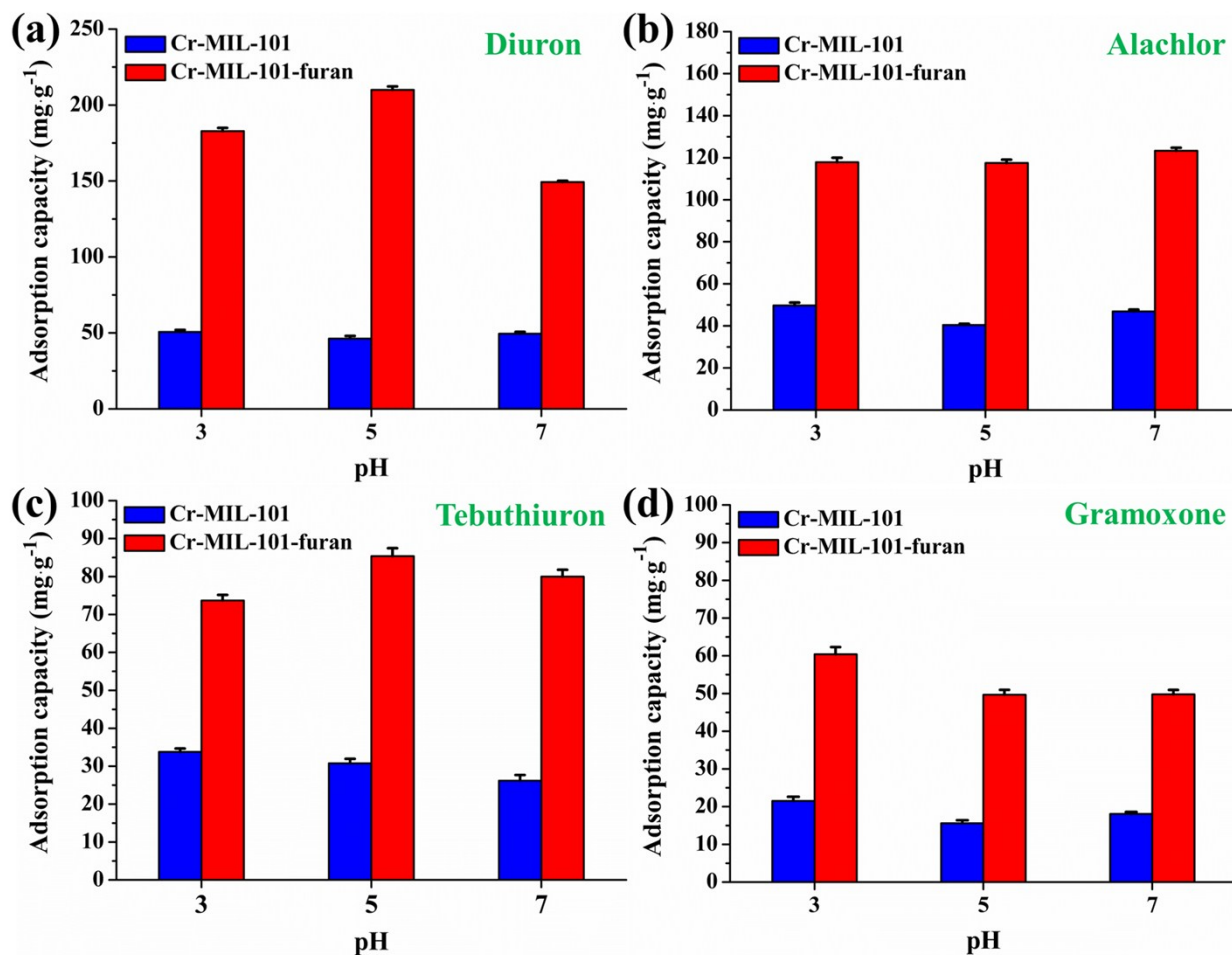

**Fig. S7** Effect of pH on adsorption capacity of (a) diuron, (b) alachlor, (c) tebuthiuron and (d) gramoxone onto Cr-MIL-101 and Cr-MIL-101-furan (Cr-MIL-101-C1). The effect of ambient pH value was investigated by mixing adsorbents (Cr-MIL-101 and Cr-MIL-101, 3 mg) with 40 mL herbicides solution with concentration of 30 ppm in the pH range of 3-7 at 30 °C for 24 h. HCl and NaOH solution of 0.1 M were utilized to adjust the pH value of herbicide solution. The mixture was shaken in a temperature-controllable orbital shaker at 200 rpm. MOFs were dried at 100 °C for 24 h before adsorption. All experiments were repeated three times.

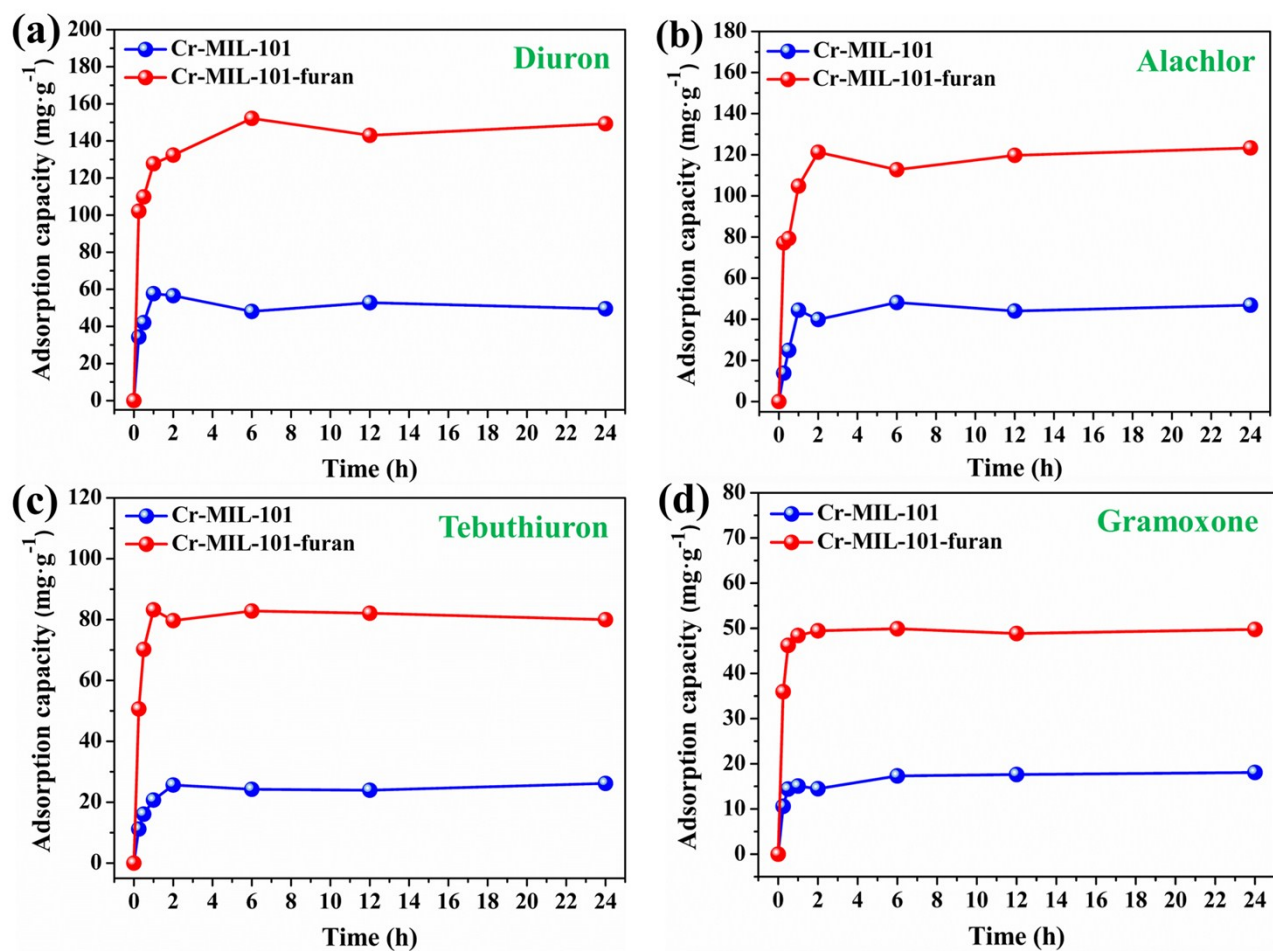

**Fig. S8** Effect of contact time on adsorption capacity of (a) diuron, (b) alachlor, (c) tebuthiuron and (d) gramoxone onto Cr-MIL-101 and Cr-MIL-101-furan (**Cr-MIL-101-C1**). In the kinetic adsorption experiment, 3 mg Cr-MIL-101 (Cr-MIL-101-furan) was added to 40 mL of a fixed pH (7.0) solution of the corresponding herbicide (30 ppm). The herbicide solution and the adsorbent were mixed thoroughly in a thermostatic shaker (200 rpm) at 30 °C. MOFs were dried at 100 °C for 24 h before adsorption. All experiments were repeated three times.

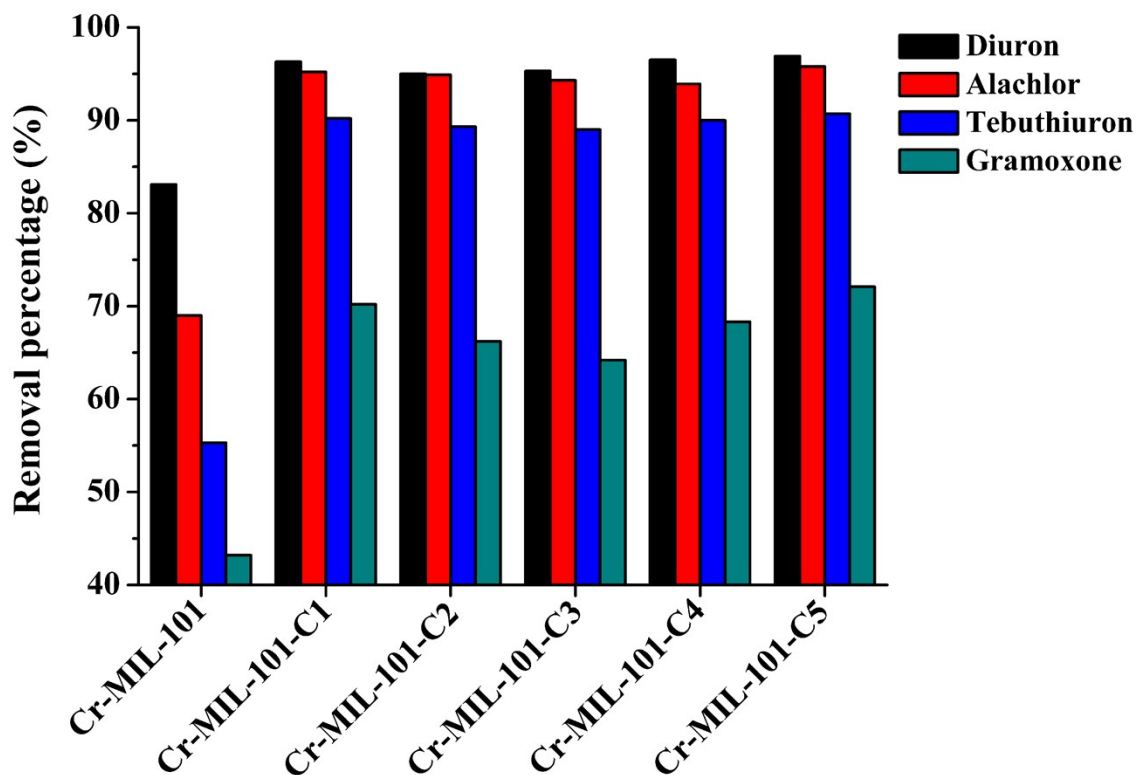

**Fig. S9** Removal percentage of adsorbed herbicides from aqueous solution of four herbicides (30 ppm) over Cr-MIL-101 and its functionalized derivatives. In the adsorption experiment, 30 mg MOFs was added to 40 mL of a fixed pH (7.0) solution of the corresponding herbicide (30 ppm). The herbicide solution and the adsorbent were mixed thoroughly in a thermostatic shaker (200 rpm) at 25 °C for 6 h. All of obtained MOFs were dried at 100 °C for 24 h before adsorption. All experiments were repeated three times.

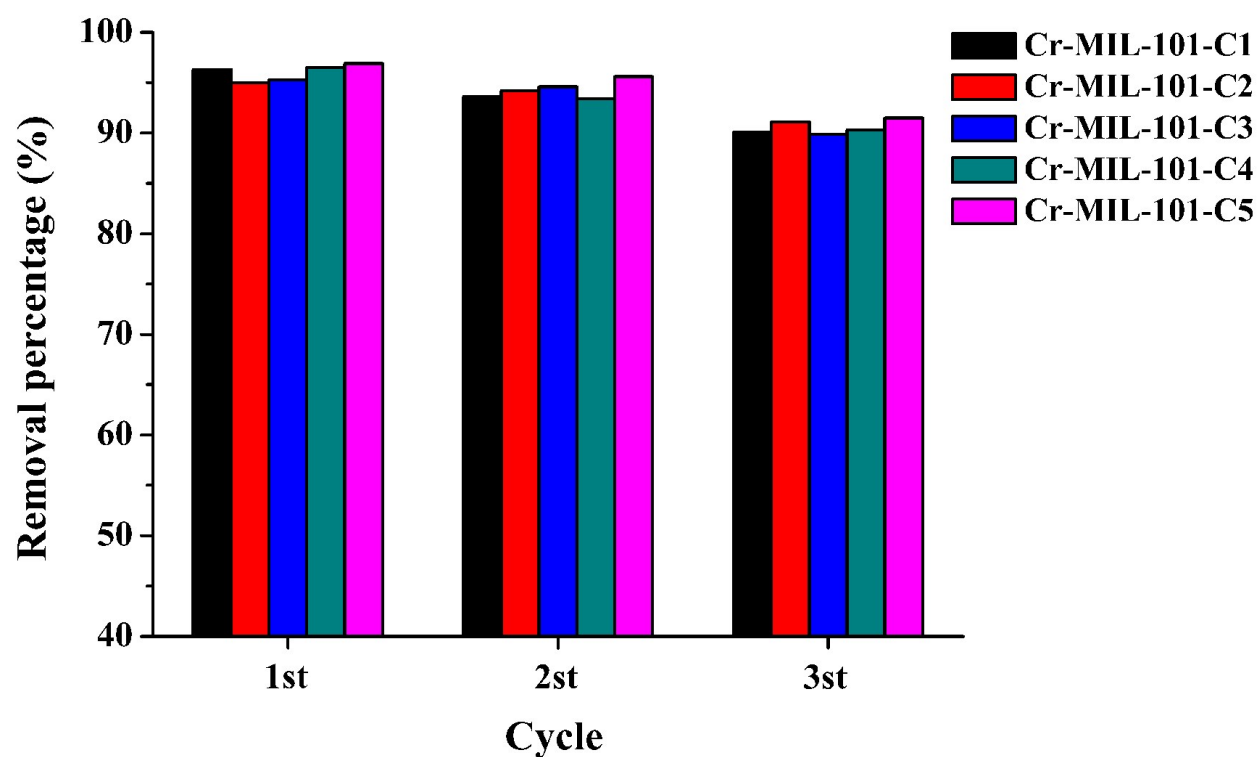

**Fig. S10** Through three cycles of diuron adsorption and regeneration with acetone, furan/thiophene-derived Cr-MIL-101s (30 mg) show only a slight decrease in diuron uptake. In a typical experiment, after the MOF samples (Cr-MIL-101-C1~C5) were loaded with diuron, then treated the MOF with acetone at room temperature to remove the diuron for the next cycle test.

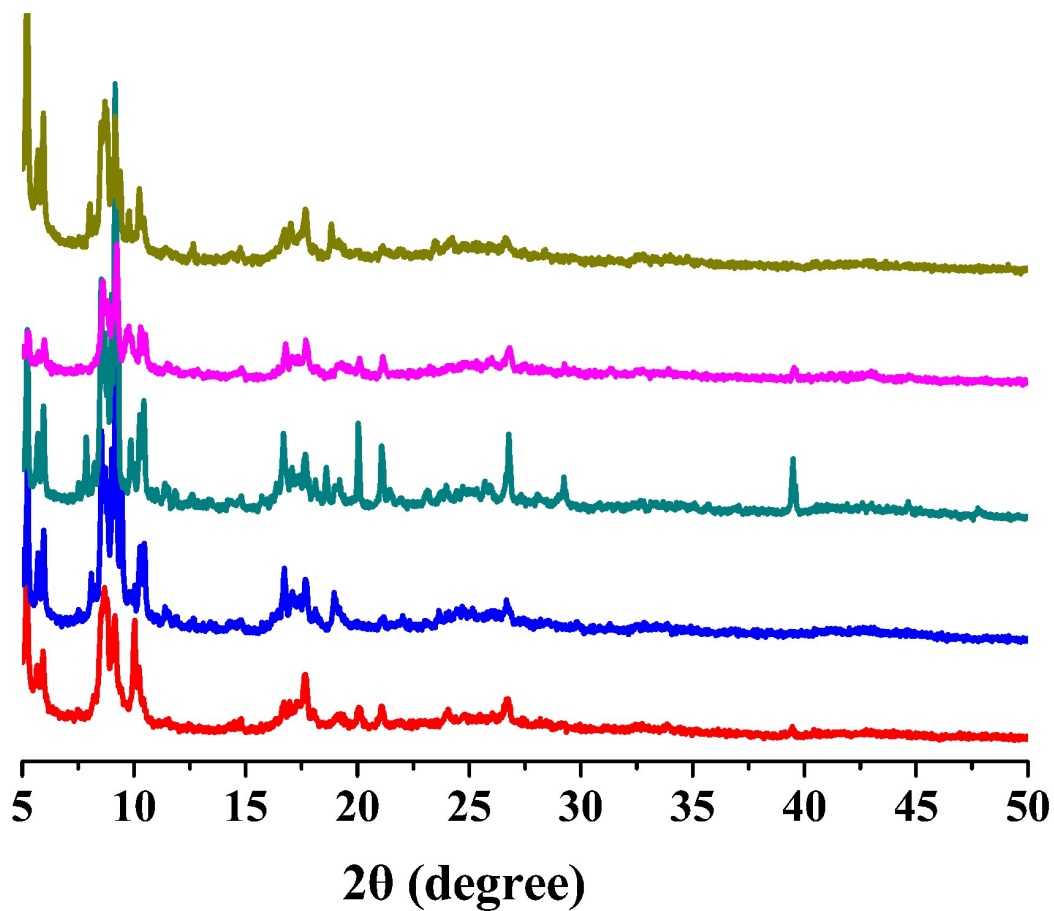

**Fig. S11** Through three cycles of diuron adsorption and regeneration with acetone, furan/thiophene-derived Cr-MIL-101s retains its bulk structural integrity as demonstrated by PXRD. Cr-MIL-101-C1 (red), Cr-MIL-101-C2 (blue), Cr-MIL-101-C3 (dark cyan), Cr-MIL-101-C4 (magenta) and Cr-MIL-101-C5 (dark yellow).

For validating if the adsorption was caused by  $\pi$ - $\pi$  or hydrogen bonding interactions, X-ray photoelectron spectroscopy (XPS) was applied to investigate the adsorption mechanism of diuron to Cr-MIL-101-C1. As shown in the following figure, the verify (0.2 eV) indicated that the O-C groups (furan) in Cr-MIL-101-C1 may present hydrogen bonding affinity toward diuron molecules.

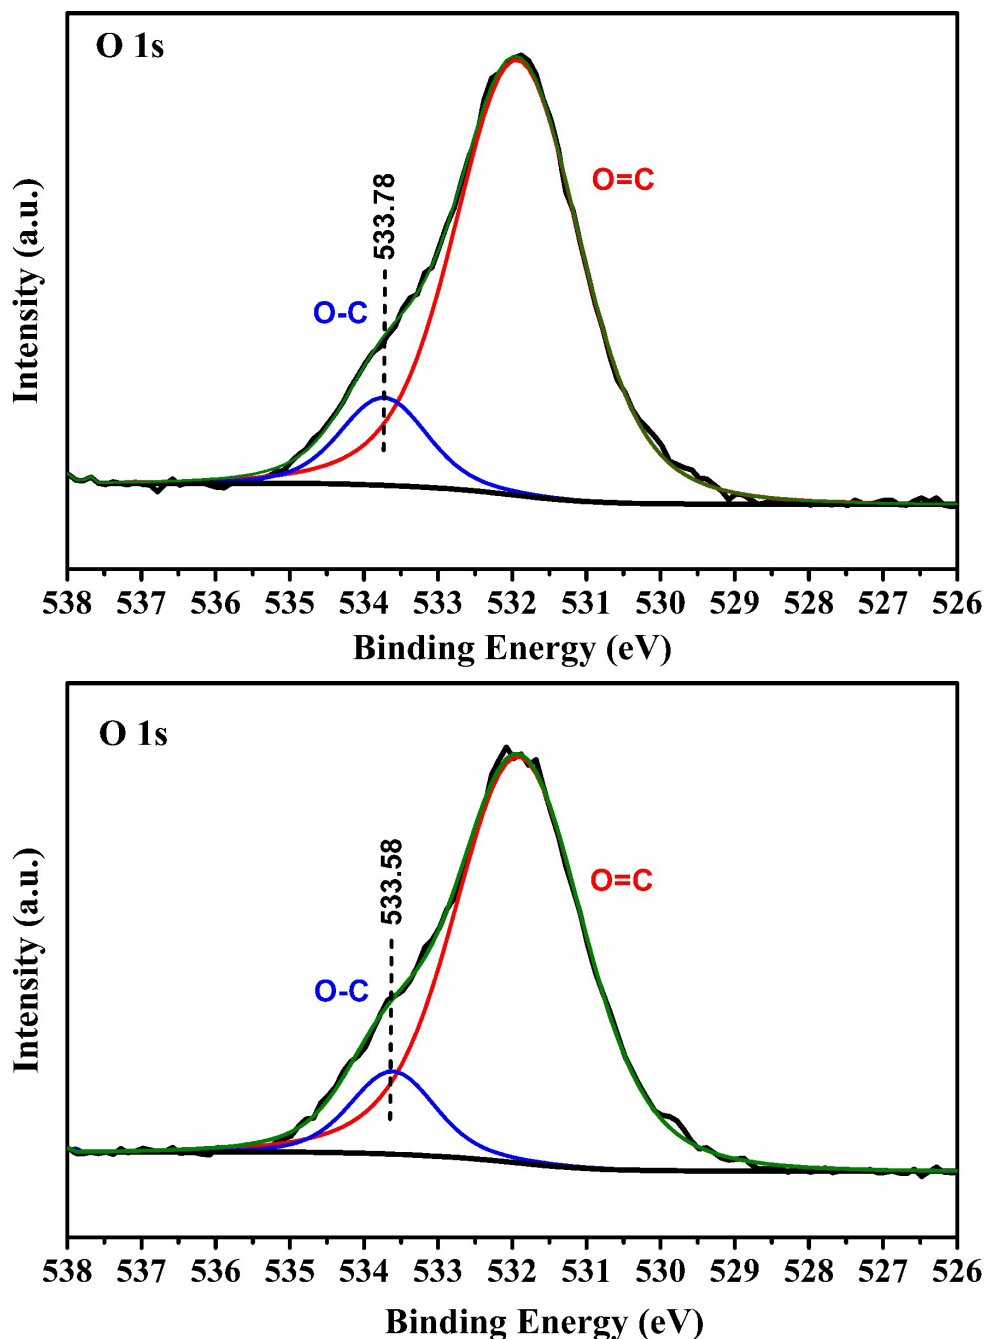

**Fig. S12** XPS spectra of Cr-MIL-101-C1 (up) and after diuron adsorption to Cr-MIL-101-C1 (down).

**Table S1** Textural parameters of Cr-MIL-101 and Cr-MIL-101-C1~C5.

| Sample        | BET surface area (m <sup>2</sup> ·g <sup>-1</sup> ) | Pore volume (mL·g <sup>-1</sup> ) |
|---------------|-----------------------------------------------------|-----------------------------------|
| Cr-MIL-101    | 2274.0                                              | 1.219                             |
| Cr-MIL-101-C1 | 951.3                                               | 0.554                             |
| Cr-MIL-101-C2 | 502.6                                               | 0.302                             |
| Cr-MIL-101-C3 | 490.6                                               | 0.282                             |
| Cr-MIL-101-C4 | 492.4                                               | 0.285                             |
| Cr-MIL-101-C5 | 543.2                                               | 0.319                             |

**Reference:**

- [S1] G. Férey, C. Mellot-Draznieks, C. Serre, F. Millange, J. Dutour, S. Surblé and I. Margiolaki, *Science.*, 2005, **309**, 2040-2042.
- [S2] S. Bernt, V. Guillermin, C. Serre and N. Stock, *Chem. Commun.*, 2011, **47**, 2838-2840.
- [S3] J. Dongmei, L. L. Keenan, A. D. Burrows and K. J. Edler, *Chem. Commun.*, 2012, **48**, 12053-12055.

HR-MS :

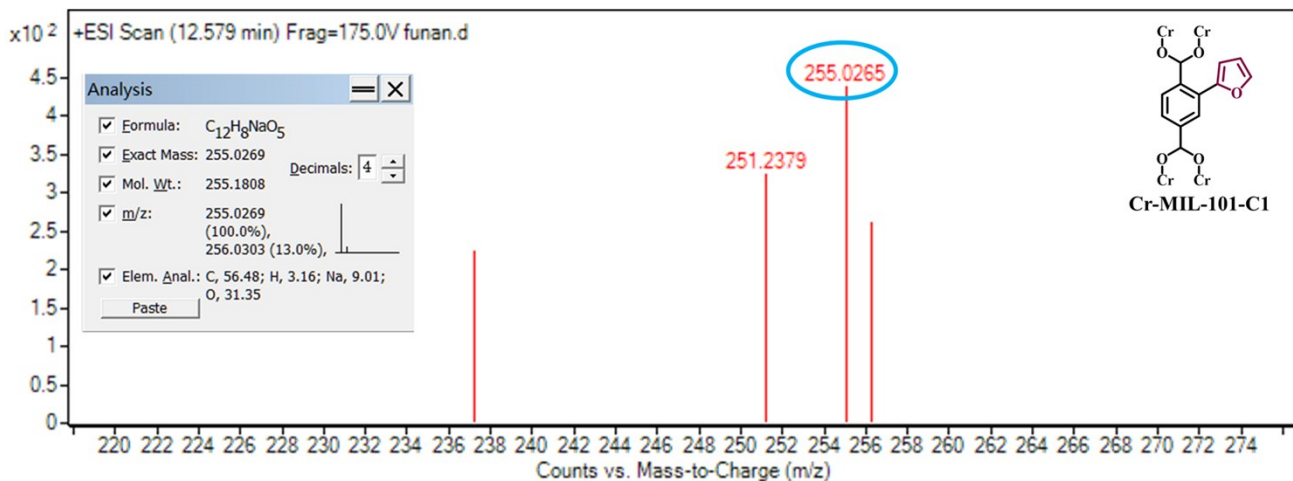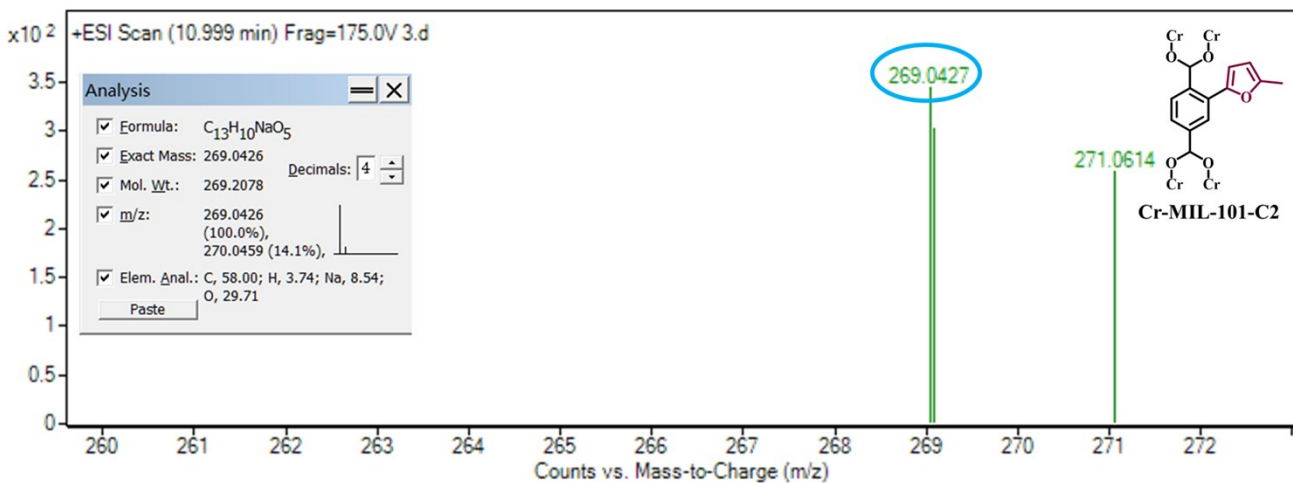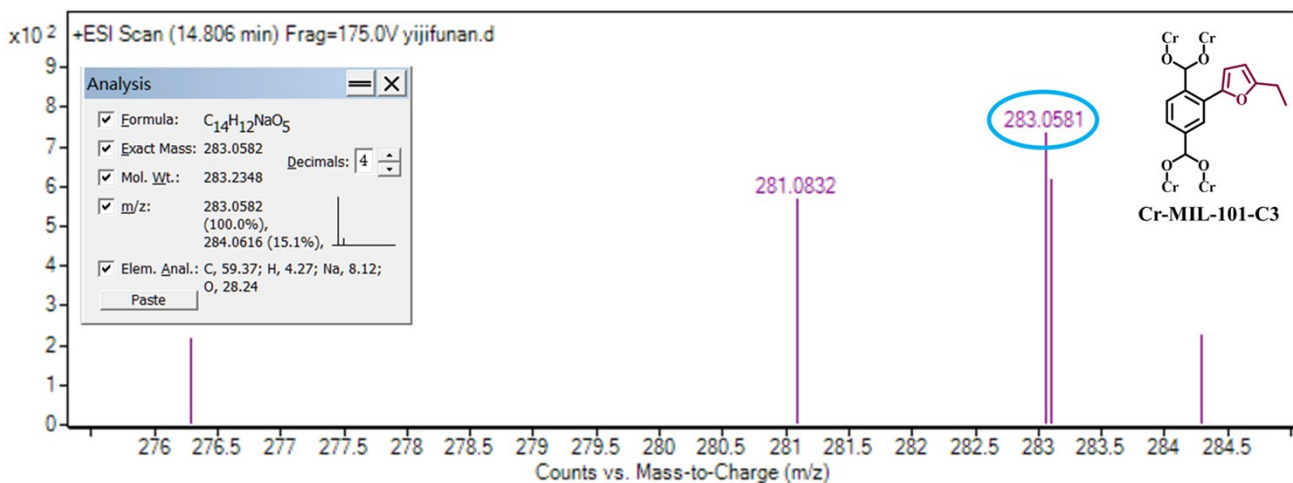



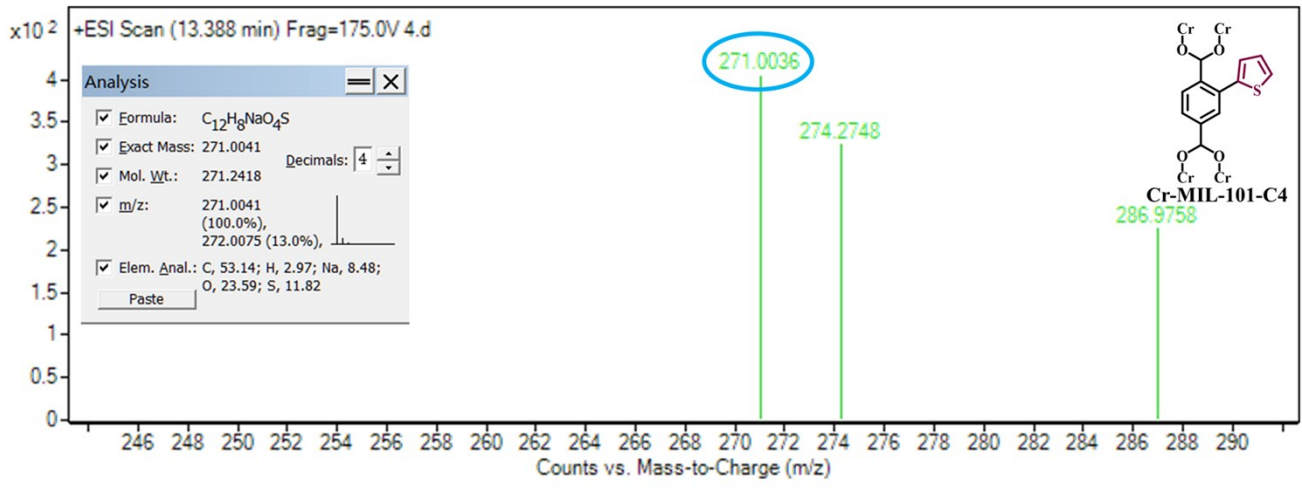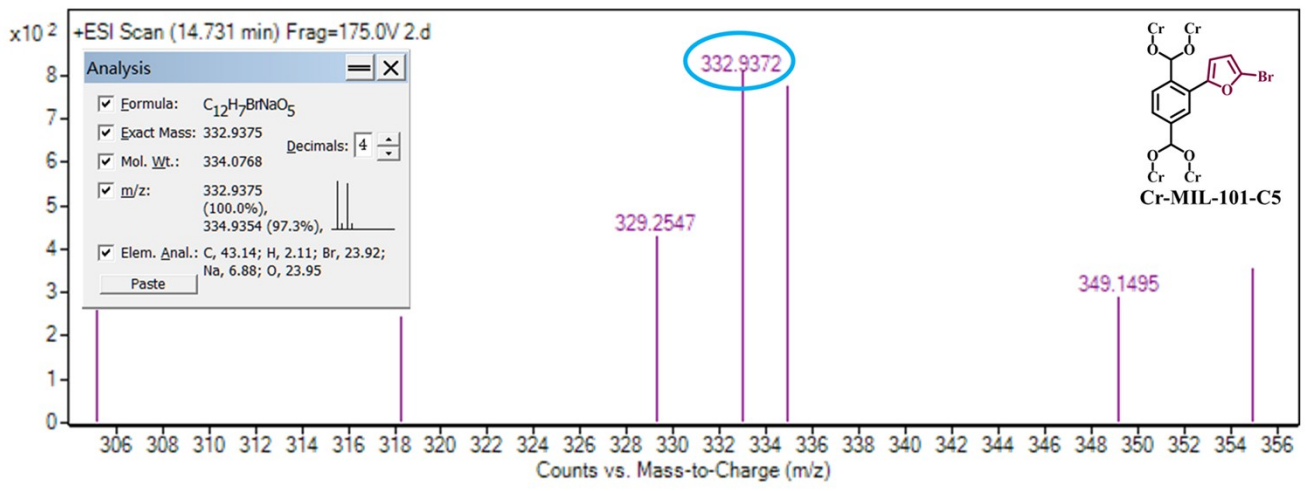

# <sup>1</sup>H NMR Spectra:

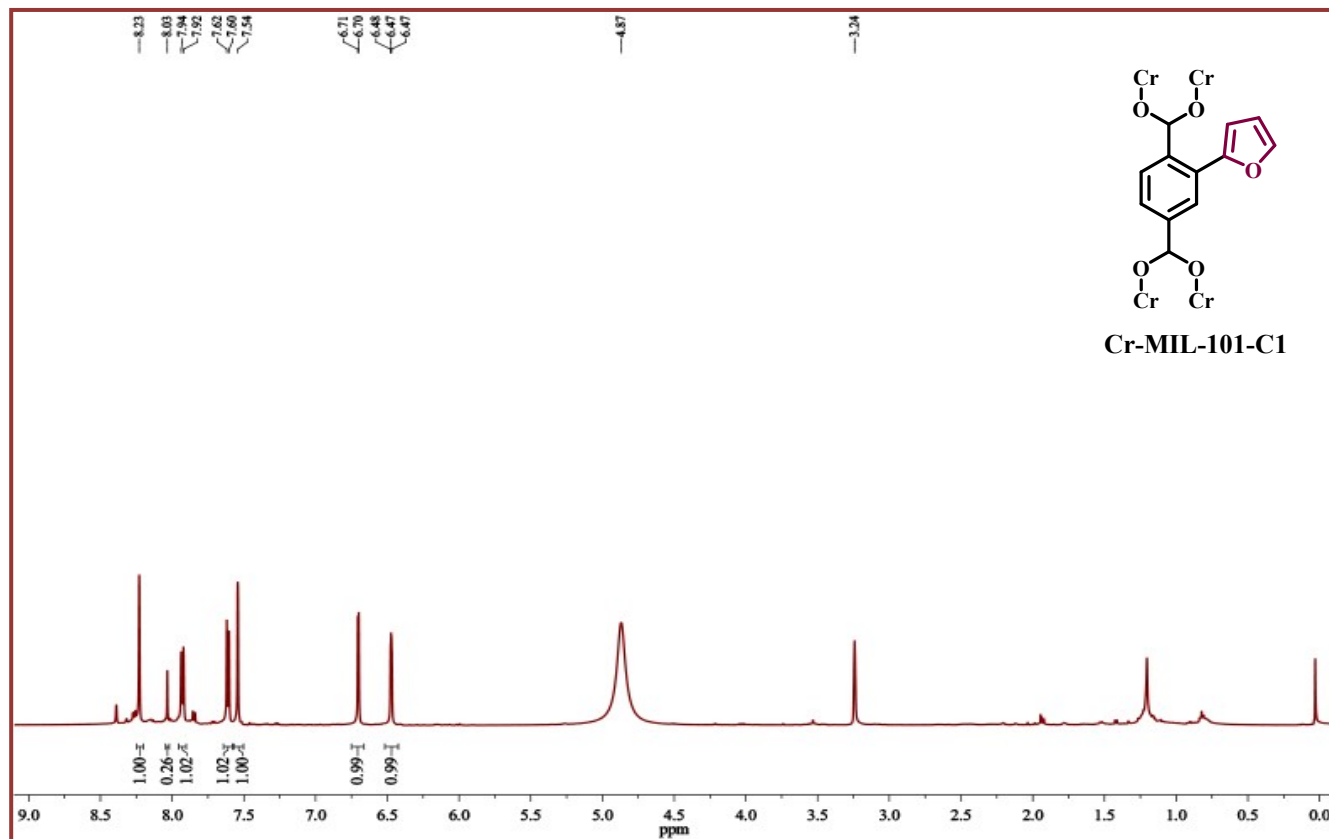

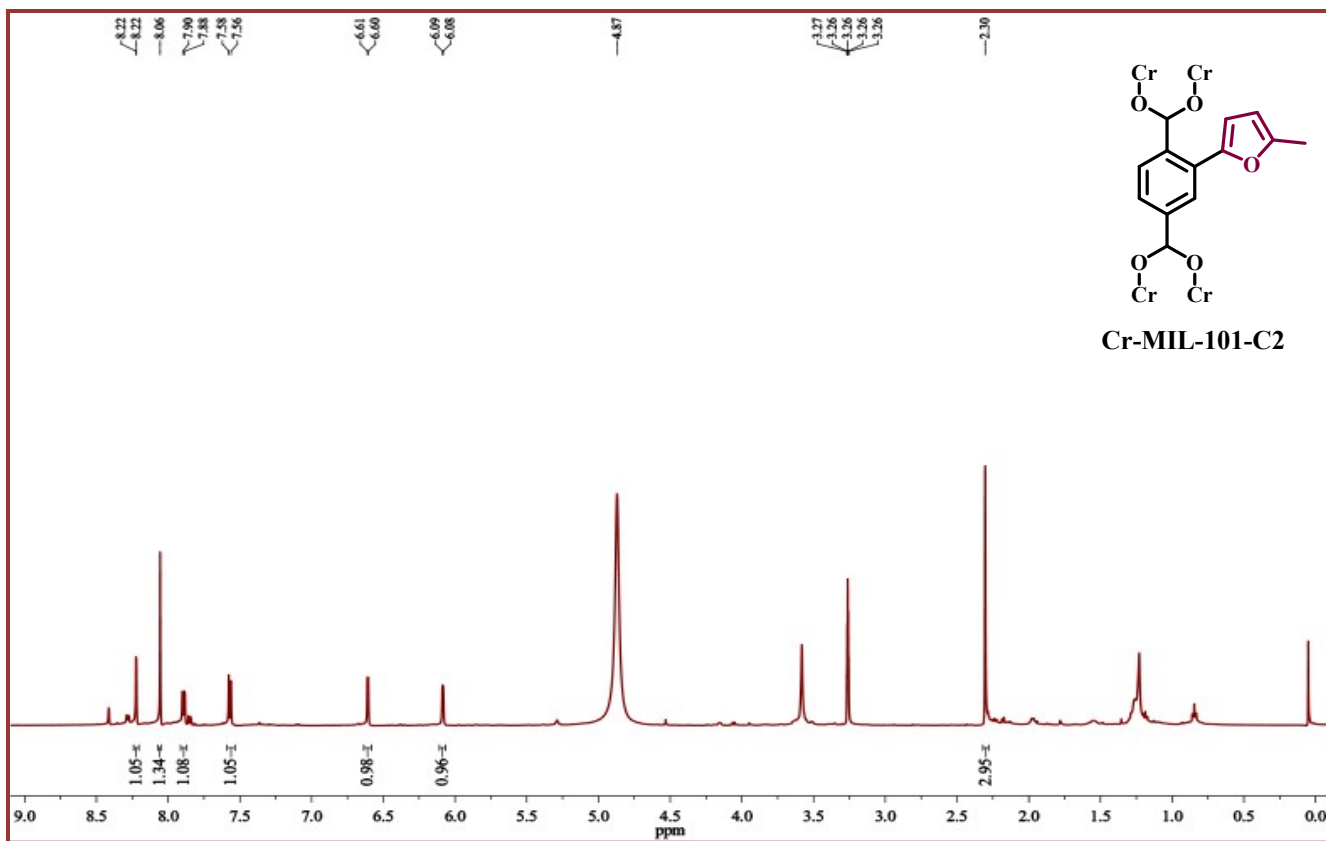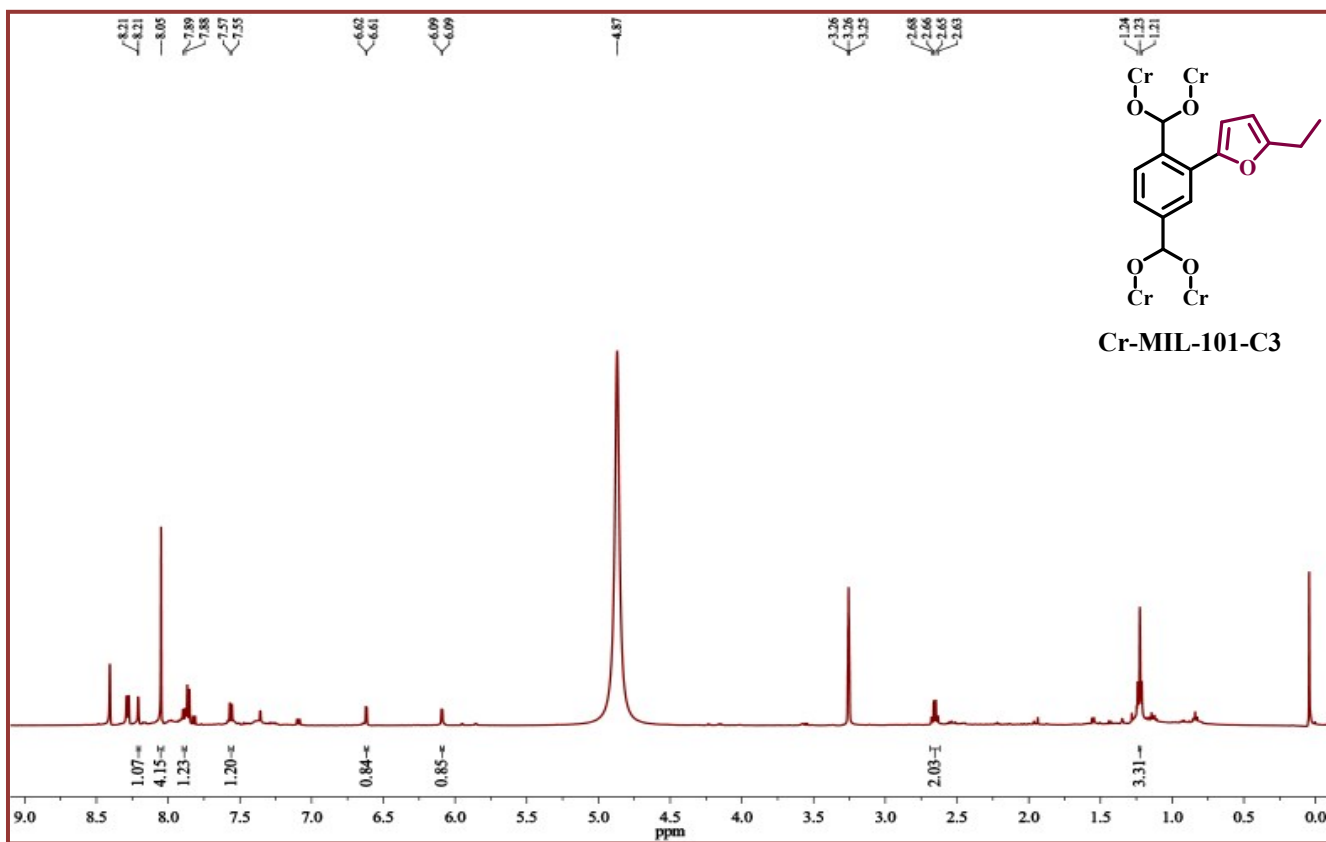

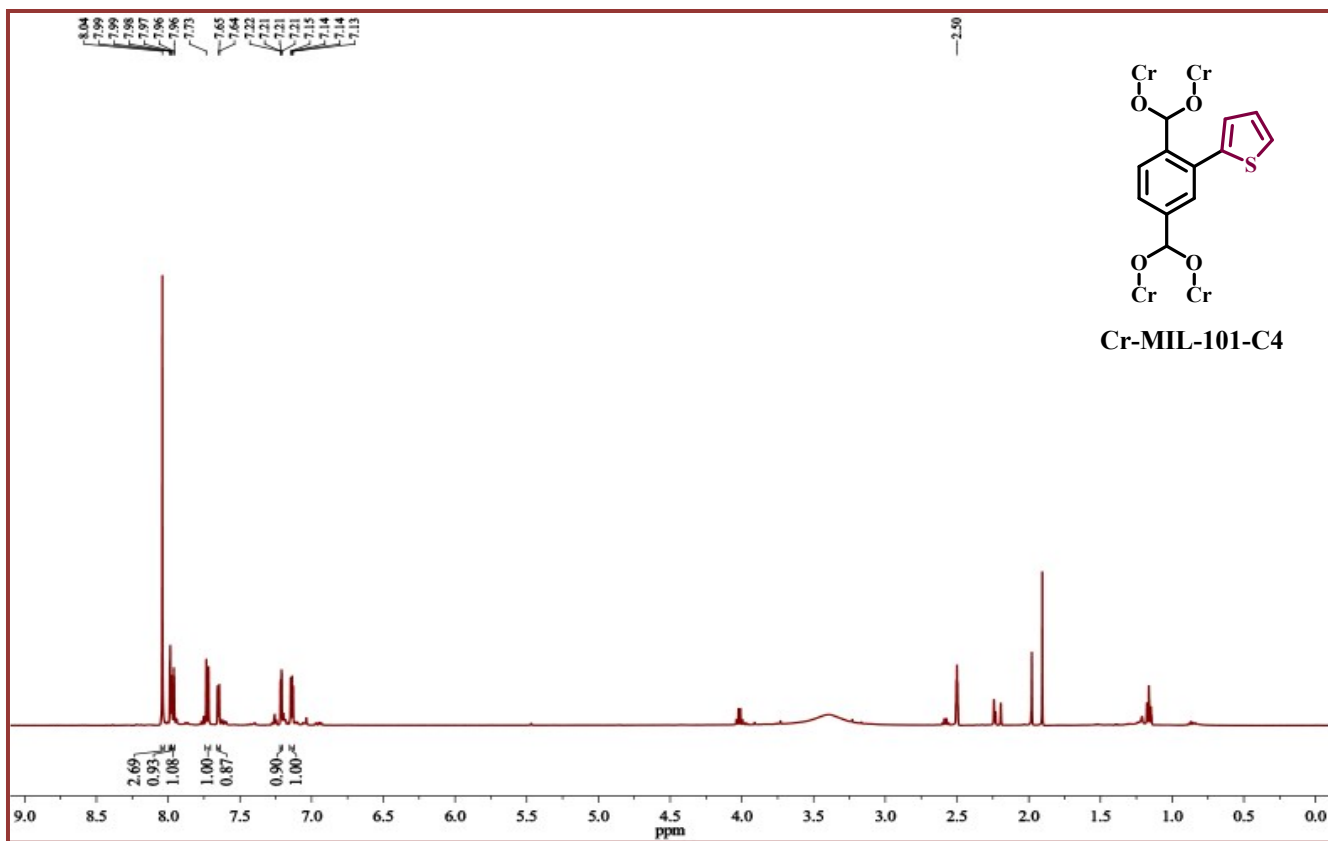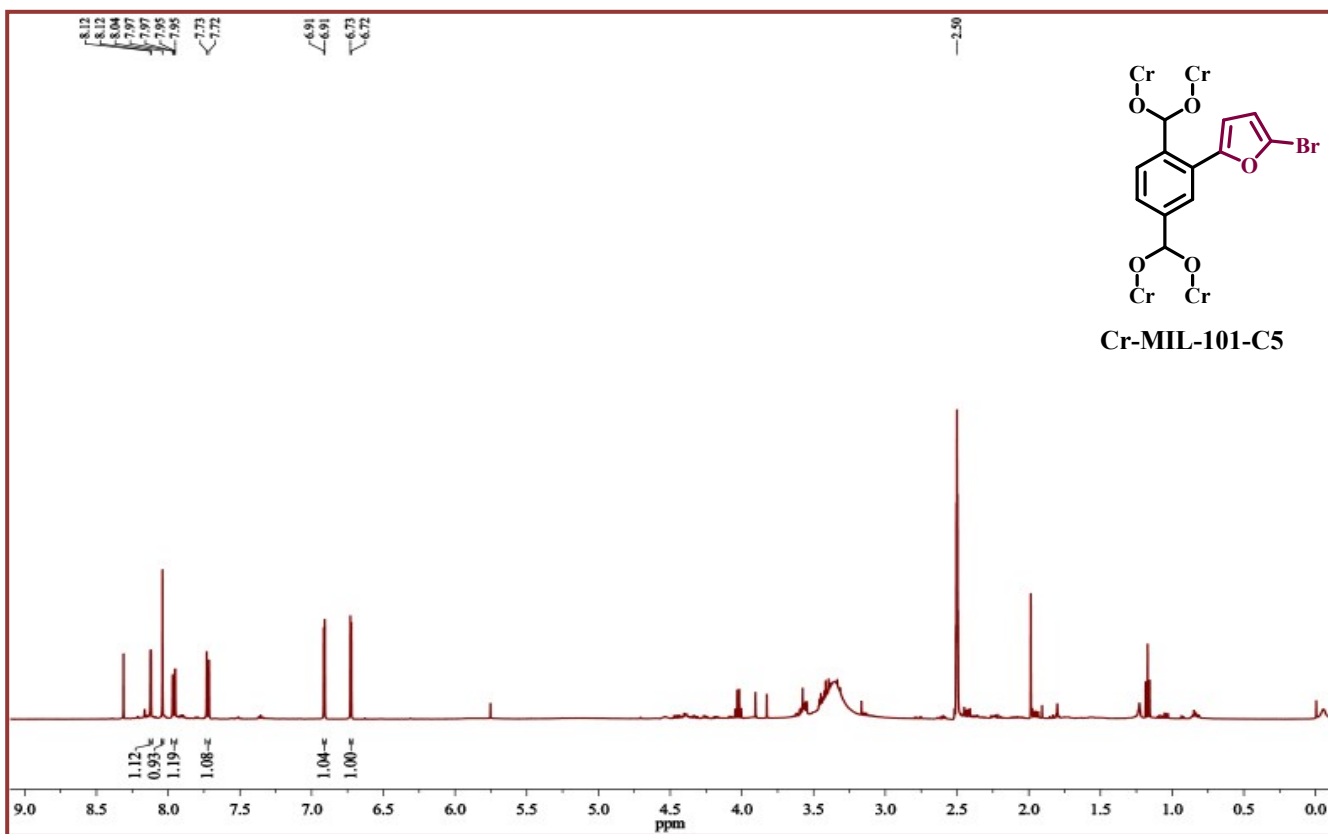

# <sup>13</sup>C NMR Spectra:

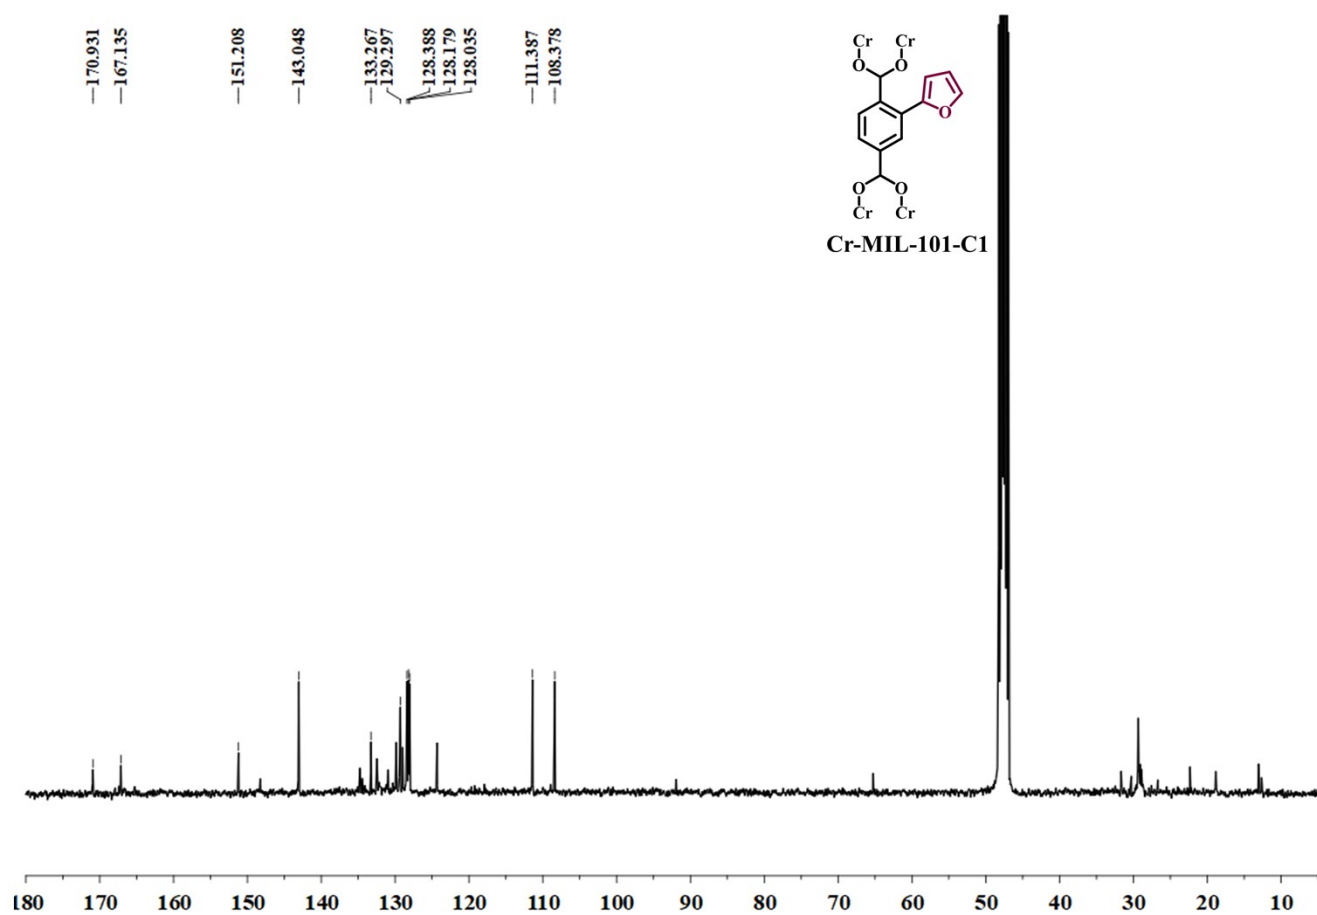

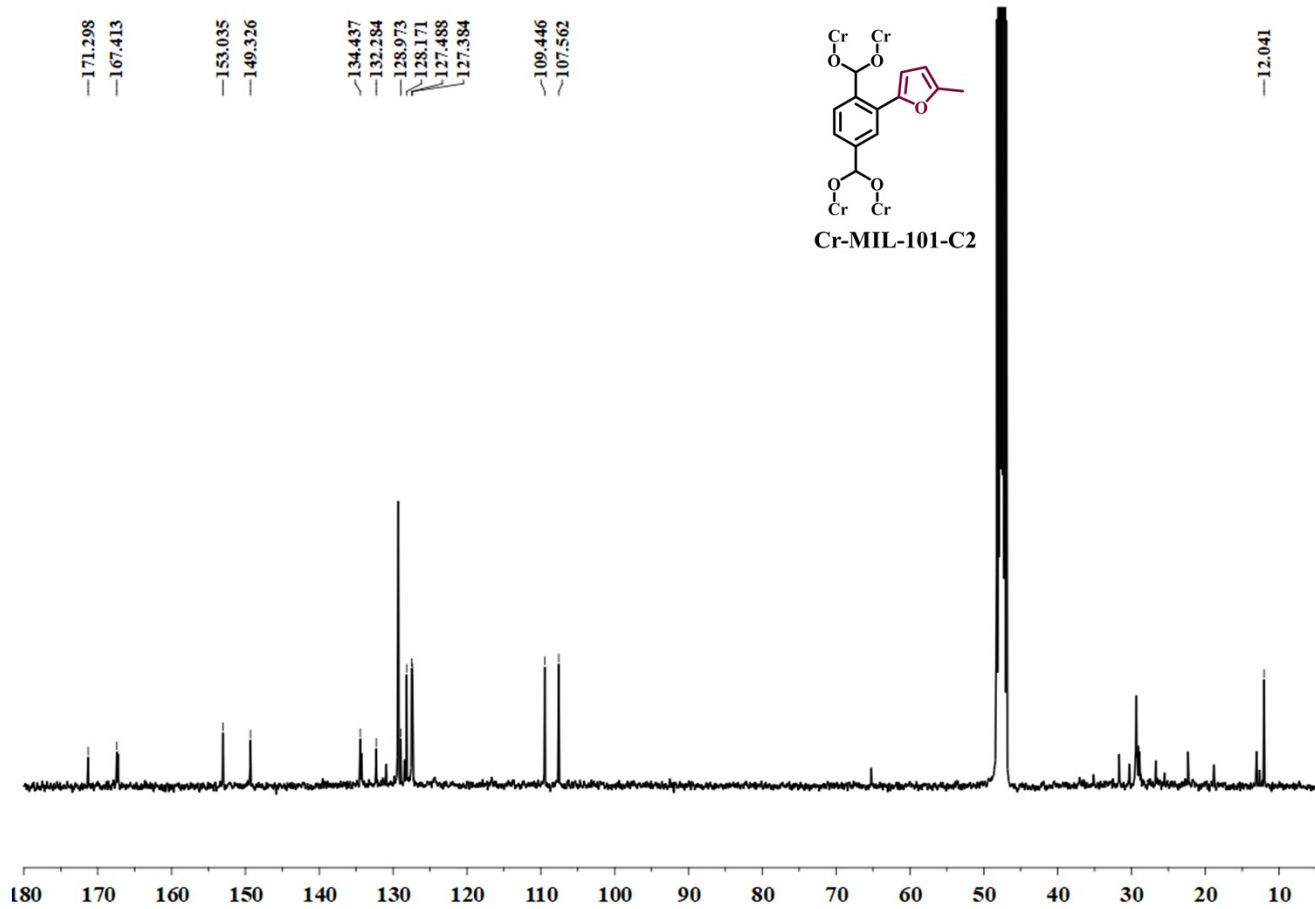

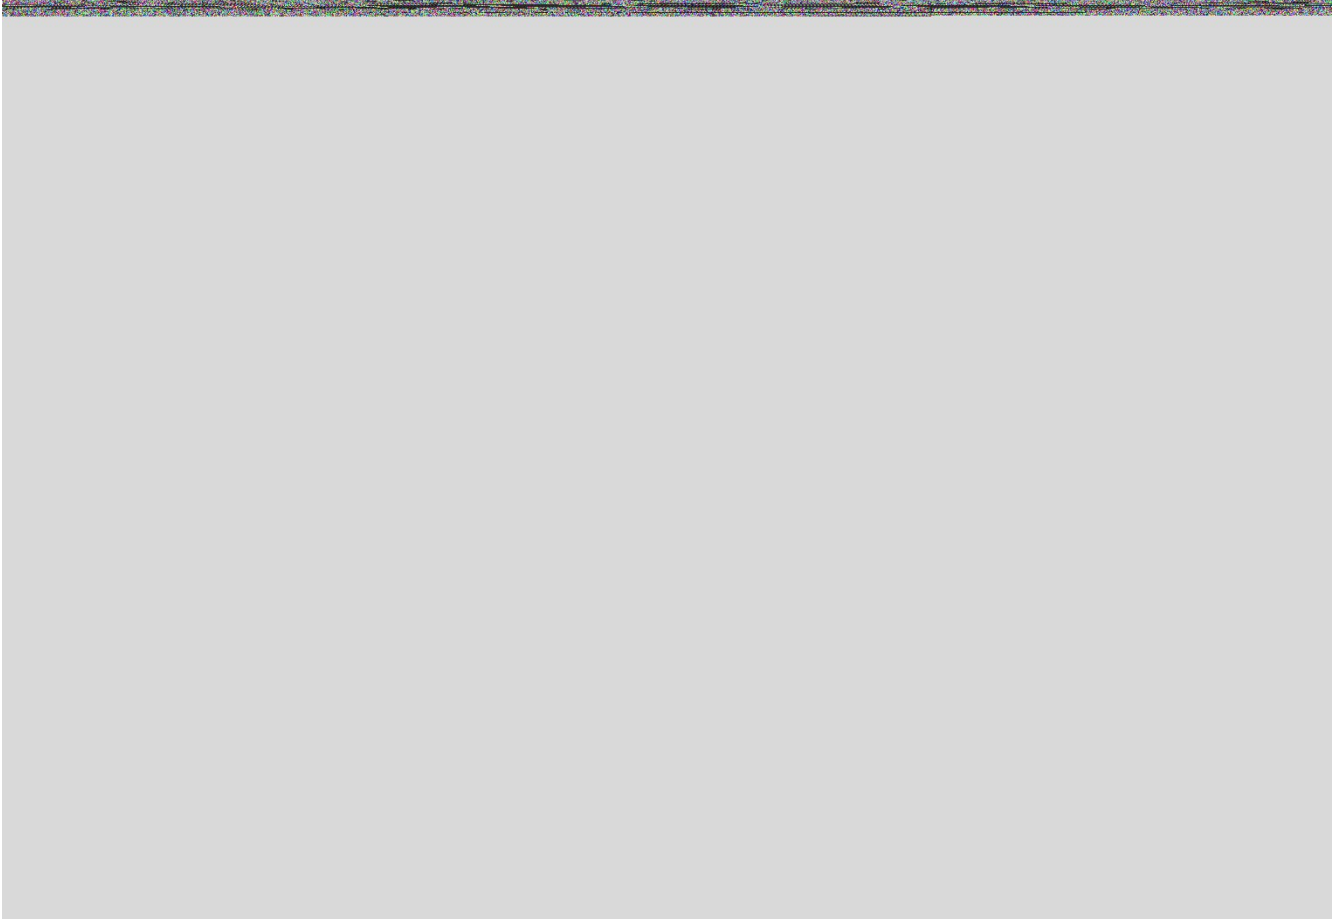

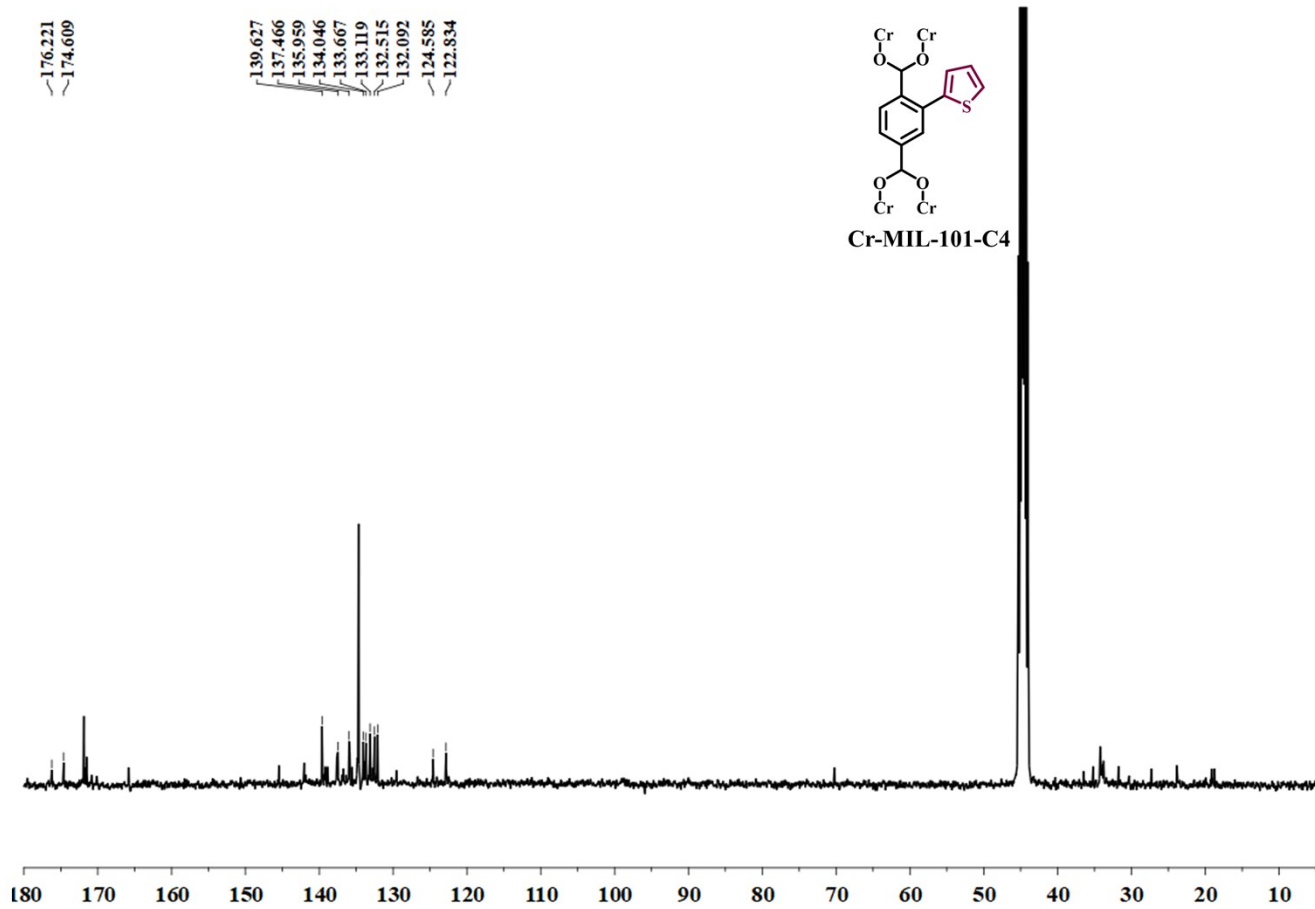



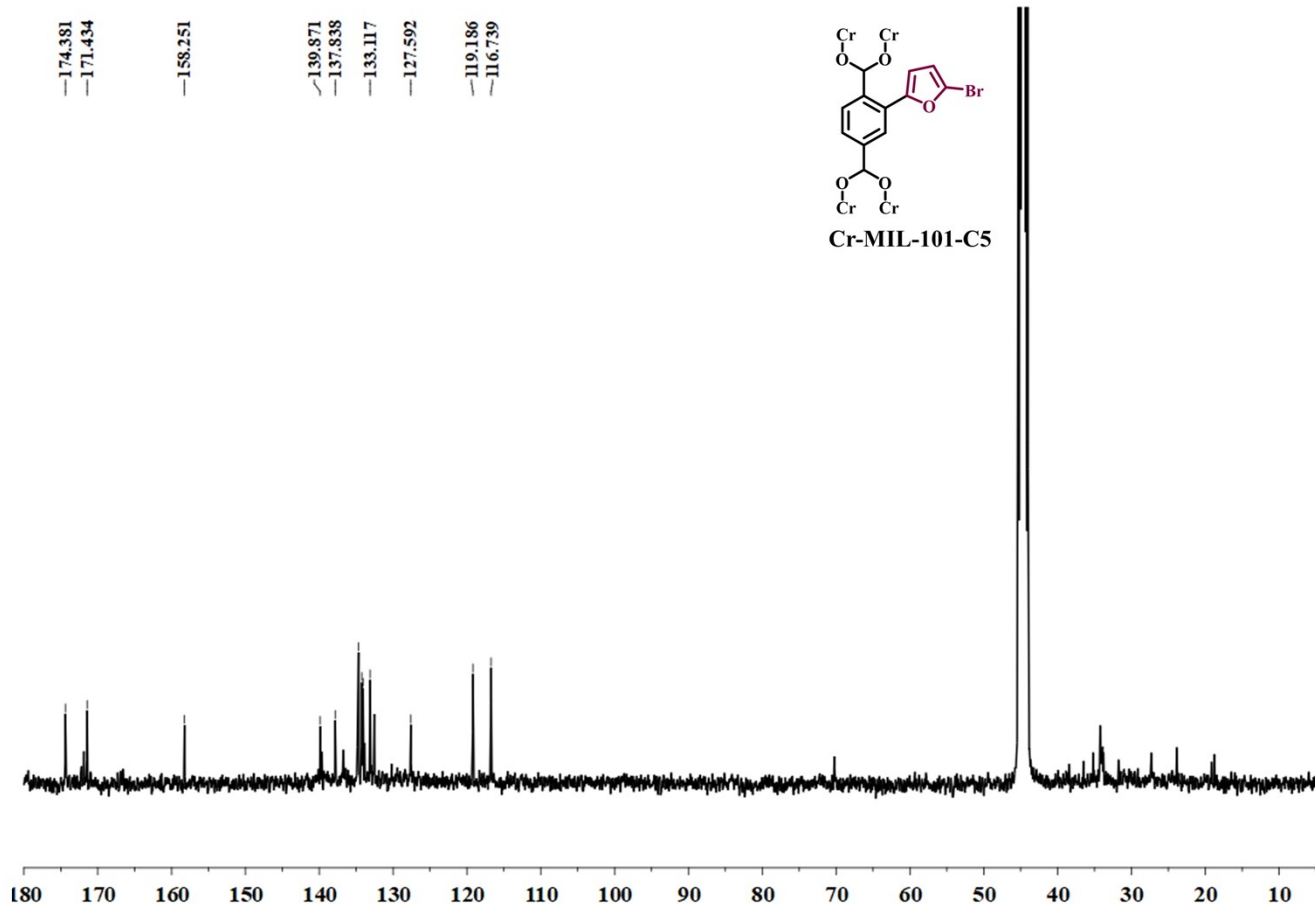

Supplement: c9cc01371g1.pdf [file c9cc01371g1.pdf]
